# Supplementary material for: A new cascade reaction: concurrent construction of six and five membered rings leading to novel fused quinazolinones
Source: Royal Society of Chemistry journal article supplement (doi:10.1039/c2ob25296a), 2012-01-01

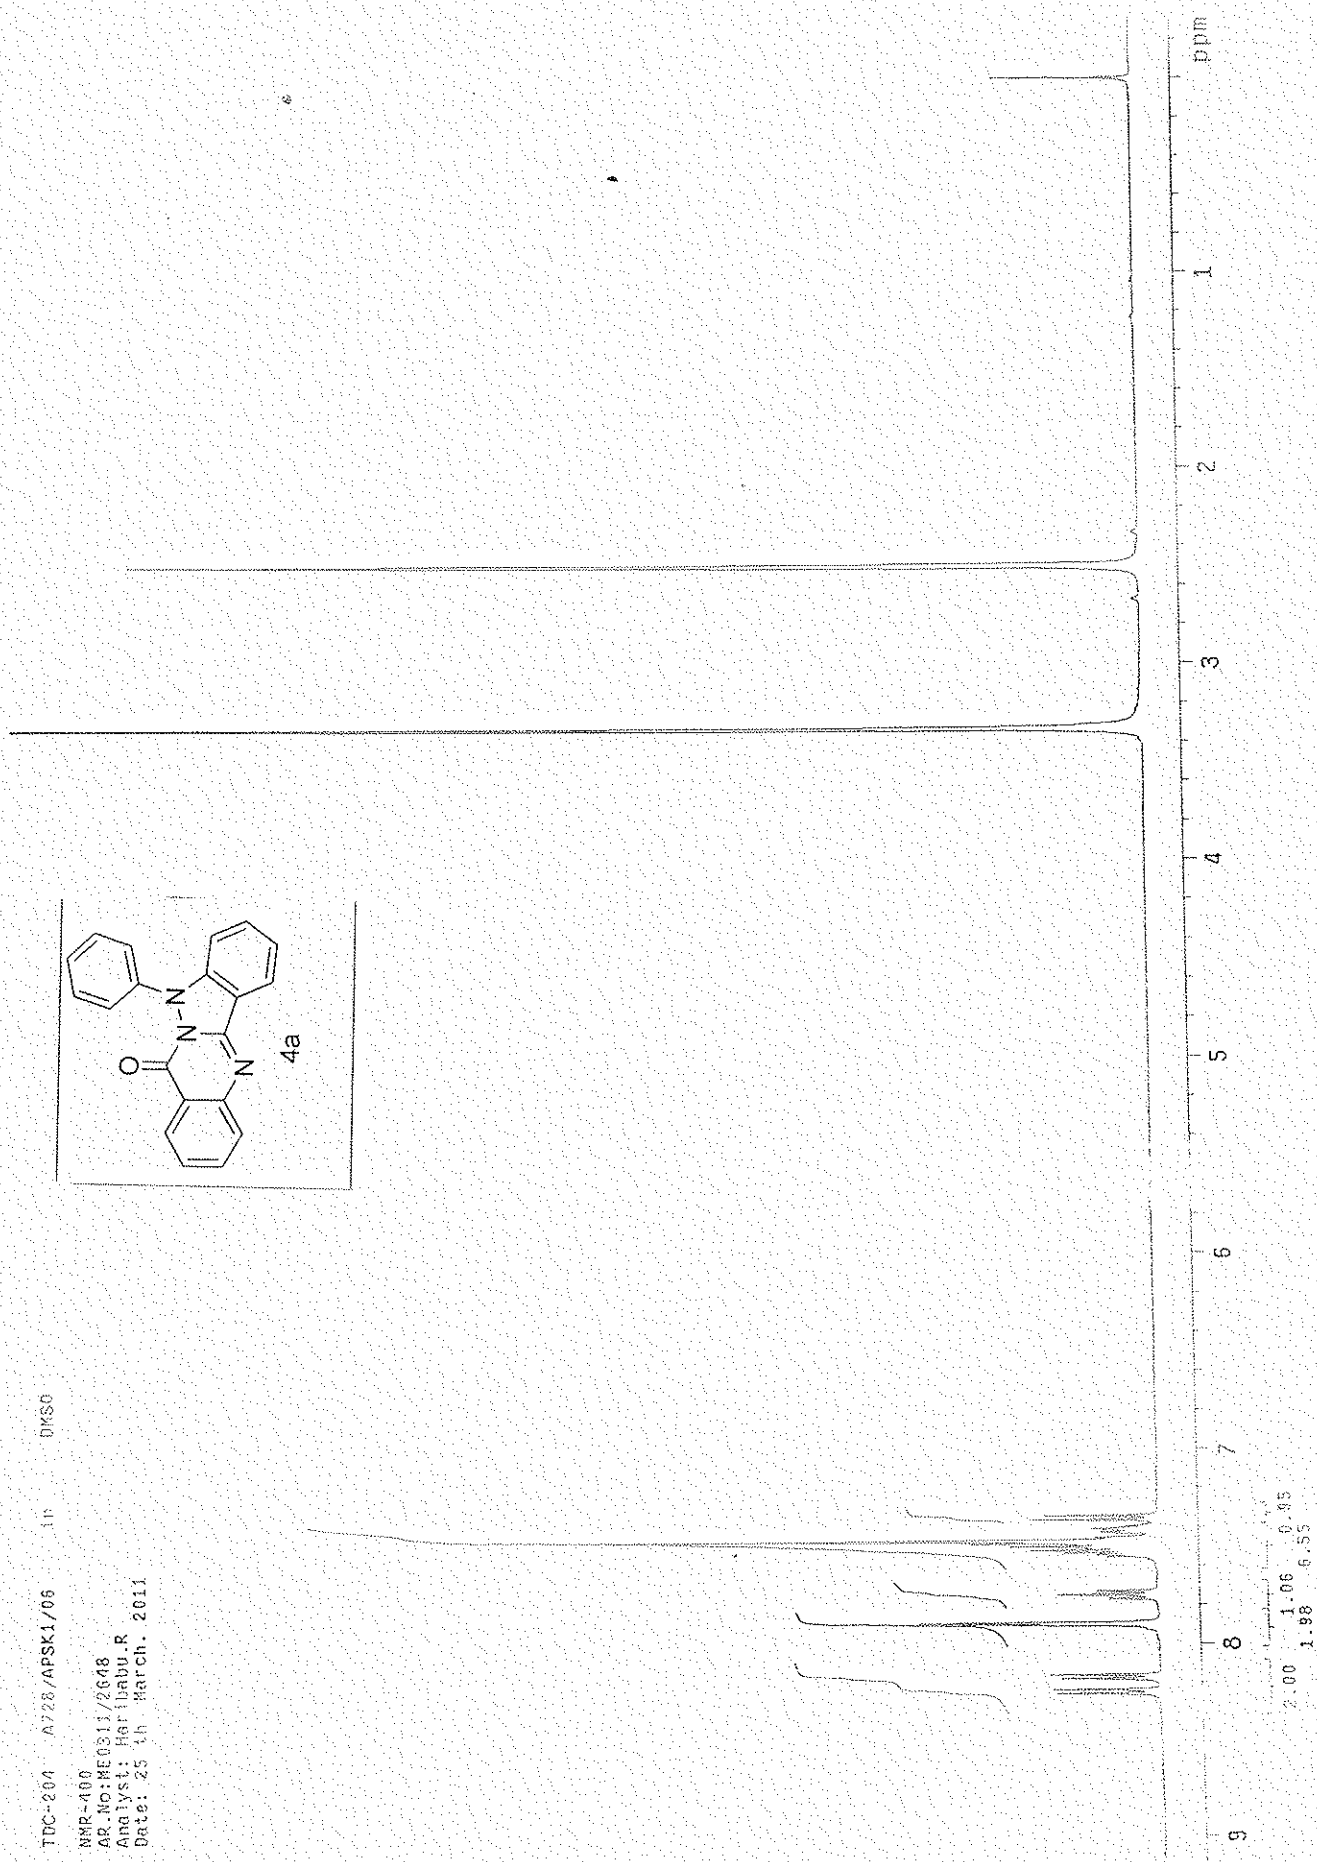

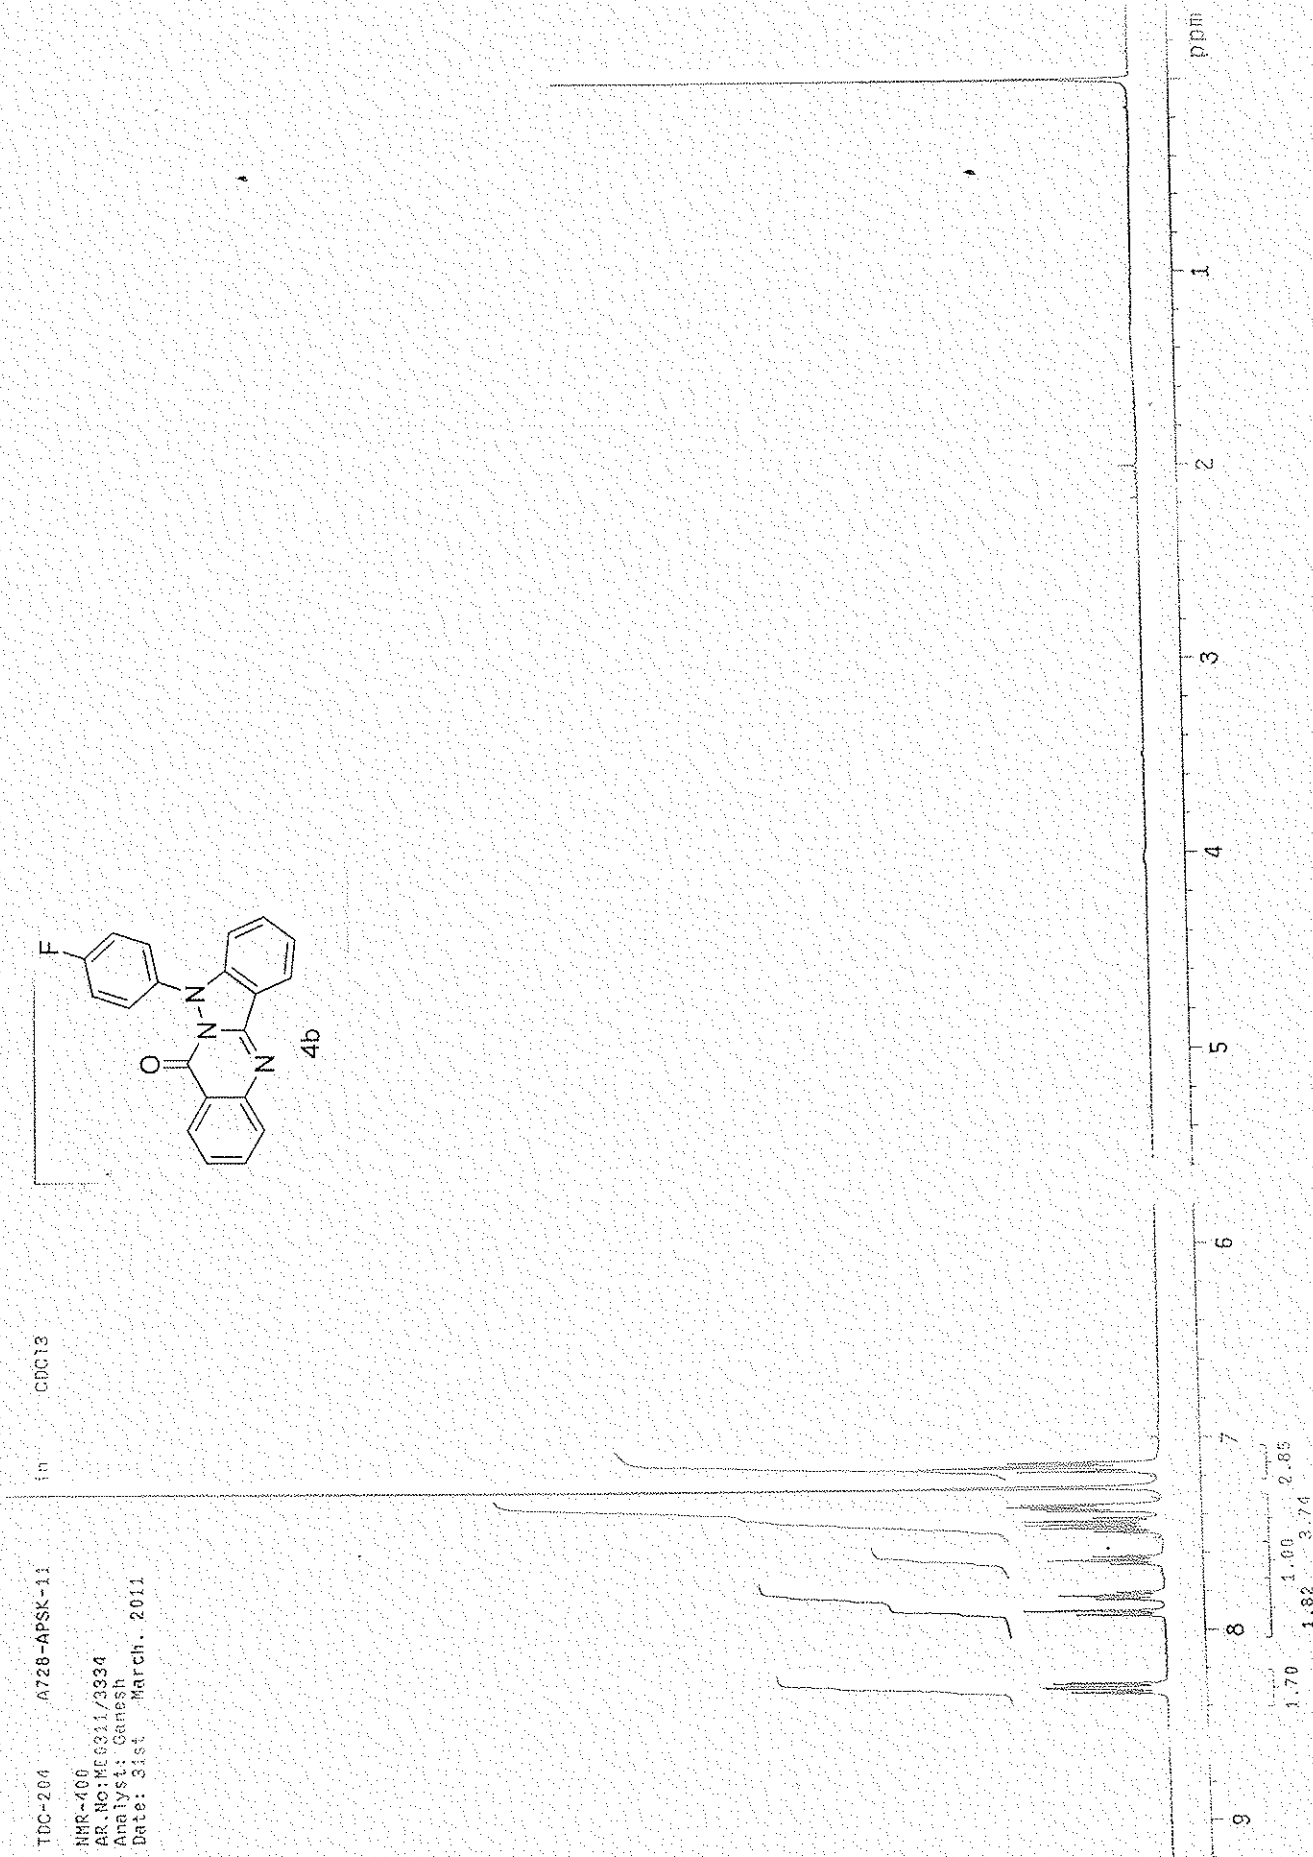

TDC-204 A728/AFSK1/13 in DMSO

NMR-400  
AR\_No:RF0411/405  
Analyt:Heribabu  
Date: 7th April 2011

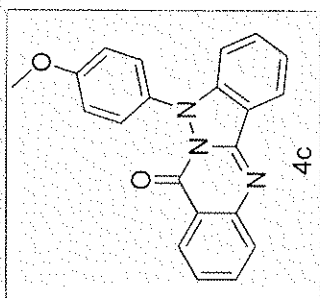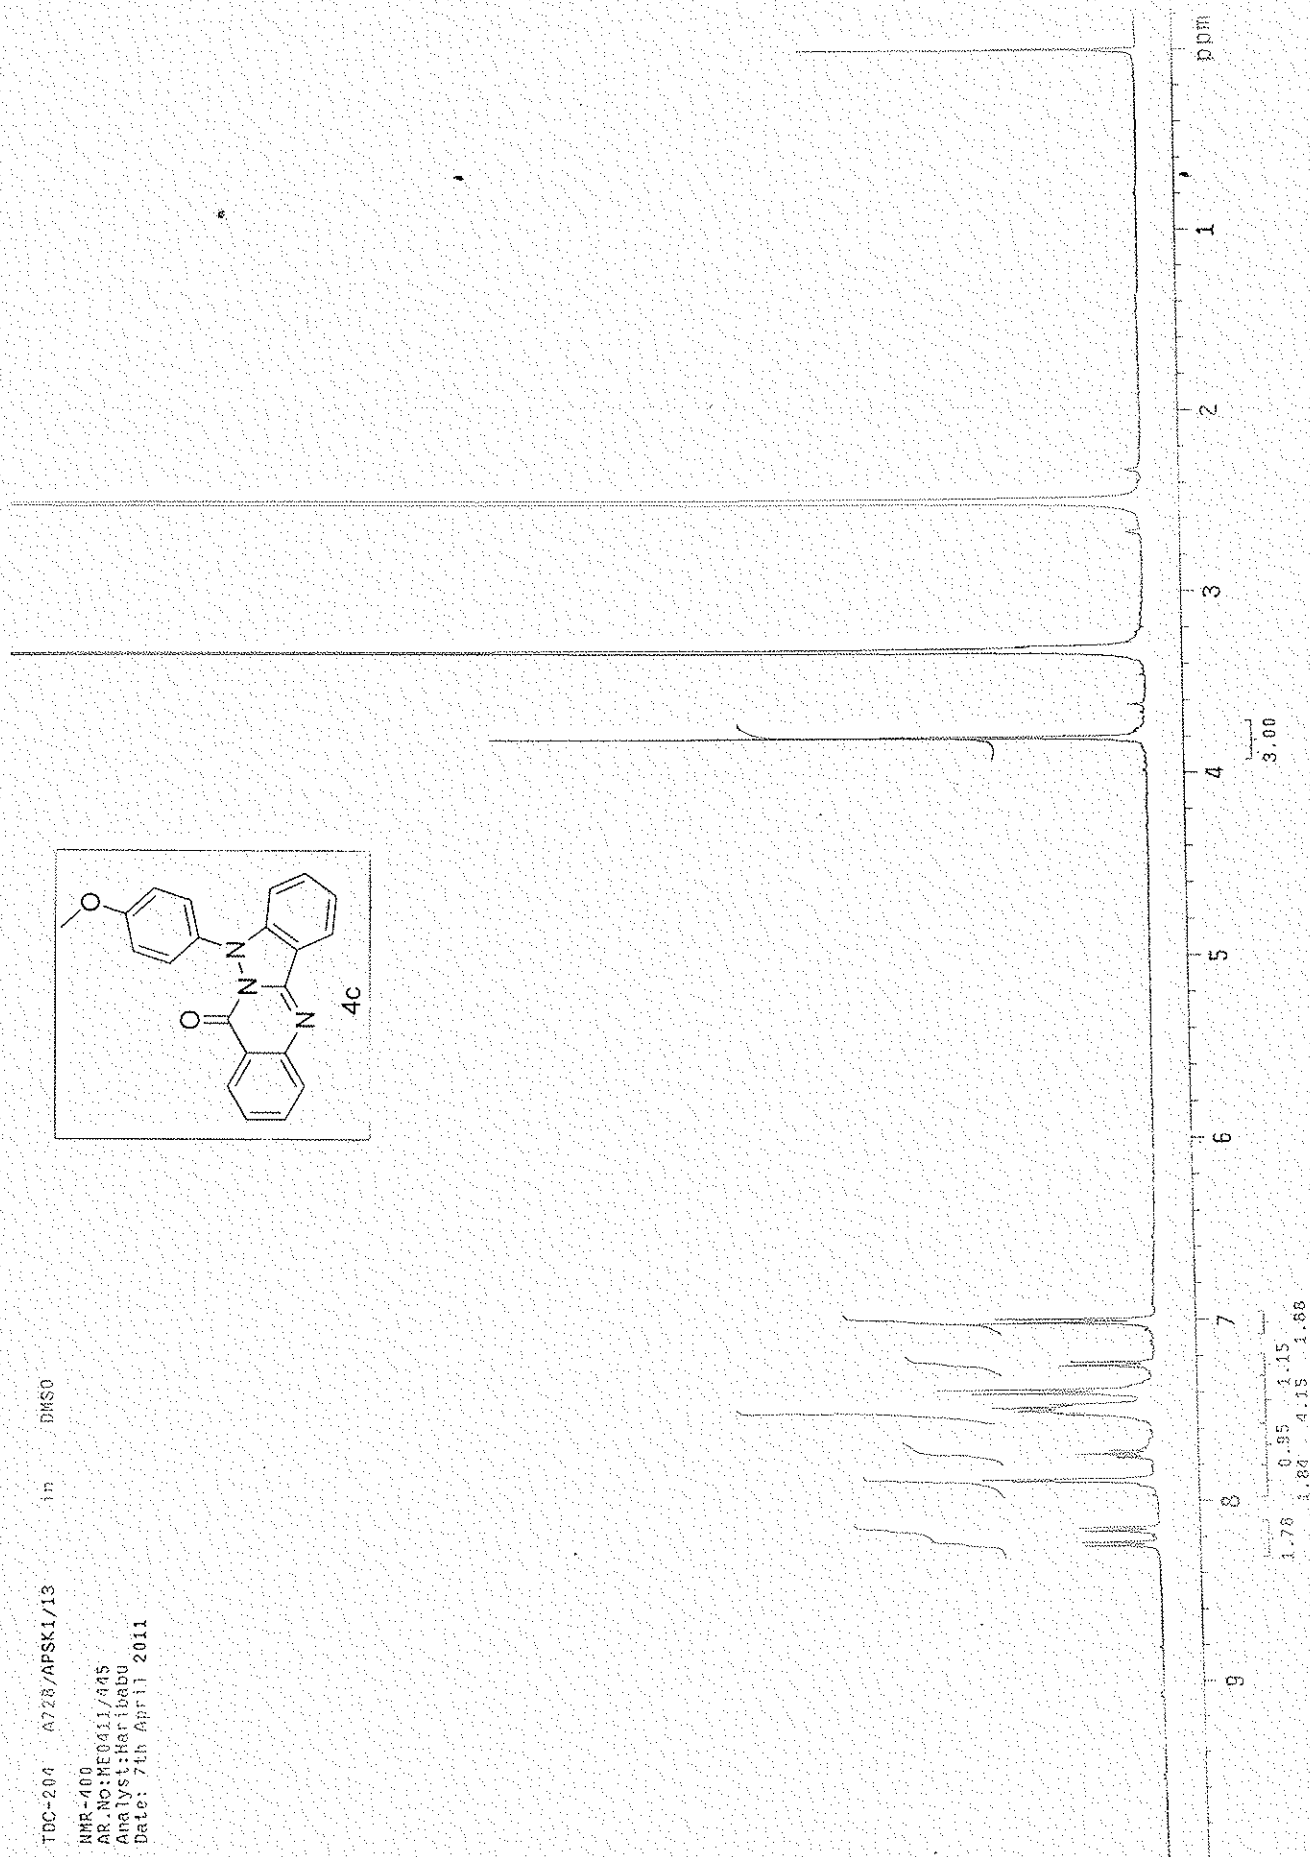

TDC-204 A728-APSK1-13 DMSO  
NMR-400  
AR\_NO:ME04117536  
Analyt: Gaurish  
Date: 11th April 2011

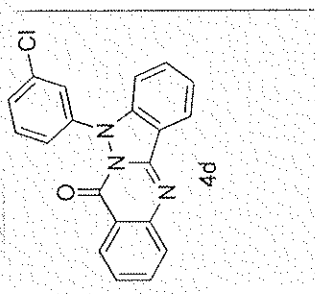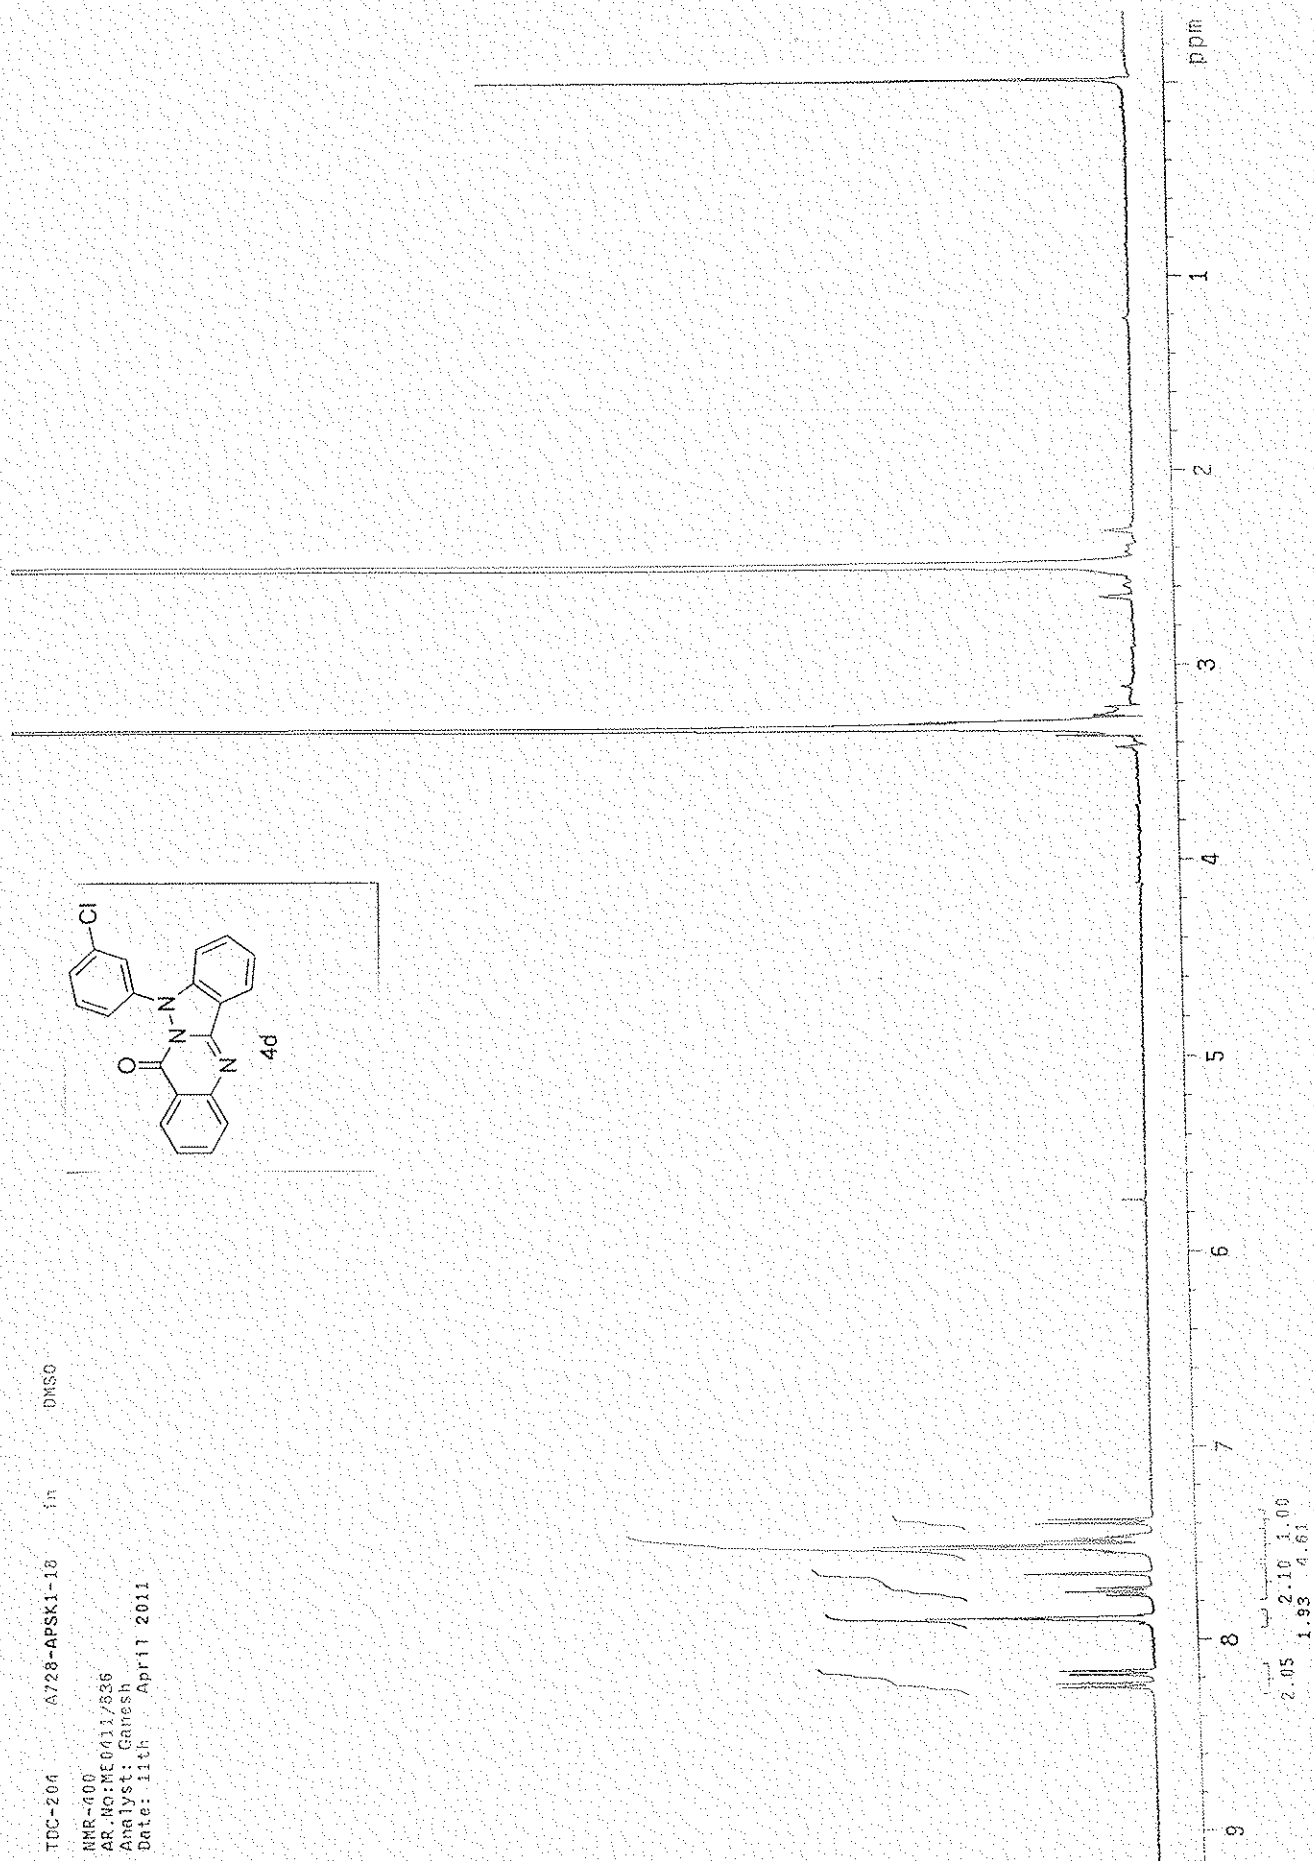

TDC-206 A728-APSK1-19 in DMSO

NMR-400  
AR.No:ME0411/1561  
Analyst:Haribabu.R  
Date: 16 th April. 2011

NUCLEUS : <sup>1</sup>H  
FREQ (MHz) : 400.23  
EXP : s2pul

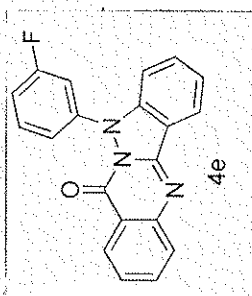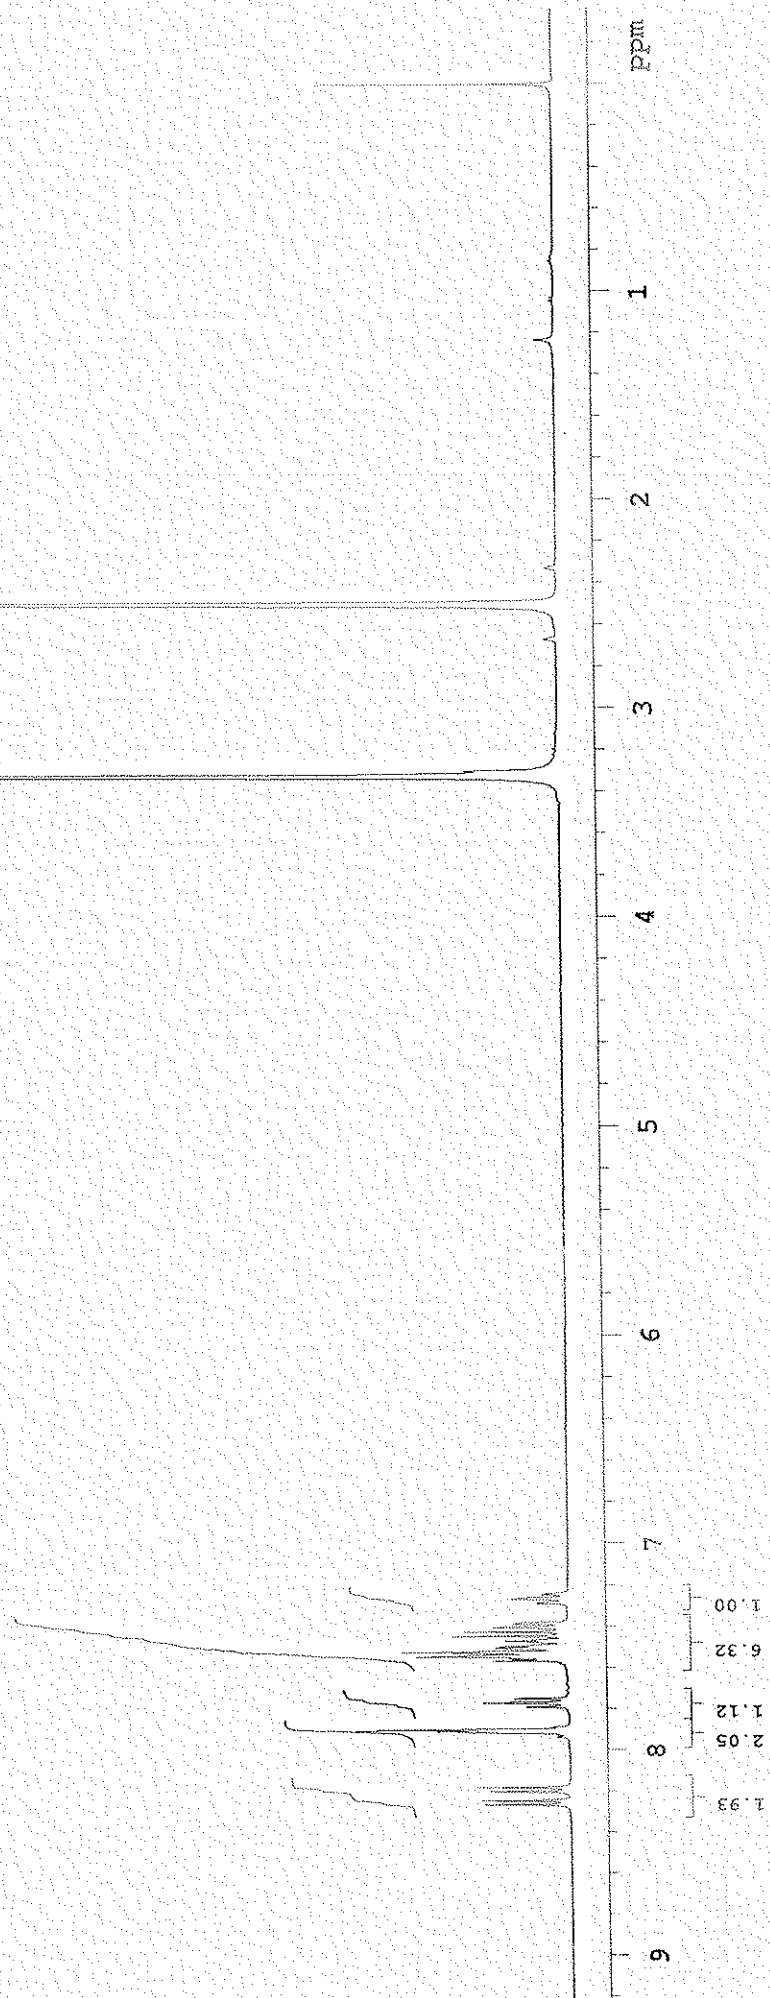



TDC-204 A728/APSX1/28 1H DMSO

NMR-400  
AP NO:ME0411/2000  
Analyst:Haribabu.R  
Date: 28 th April, 2011

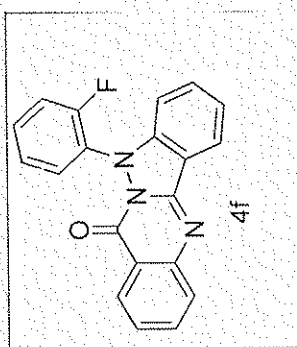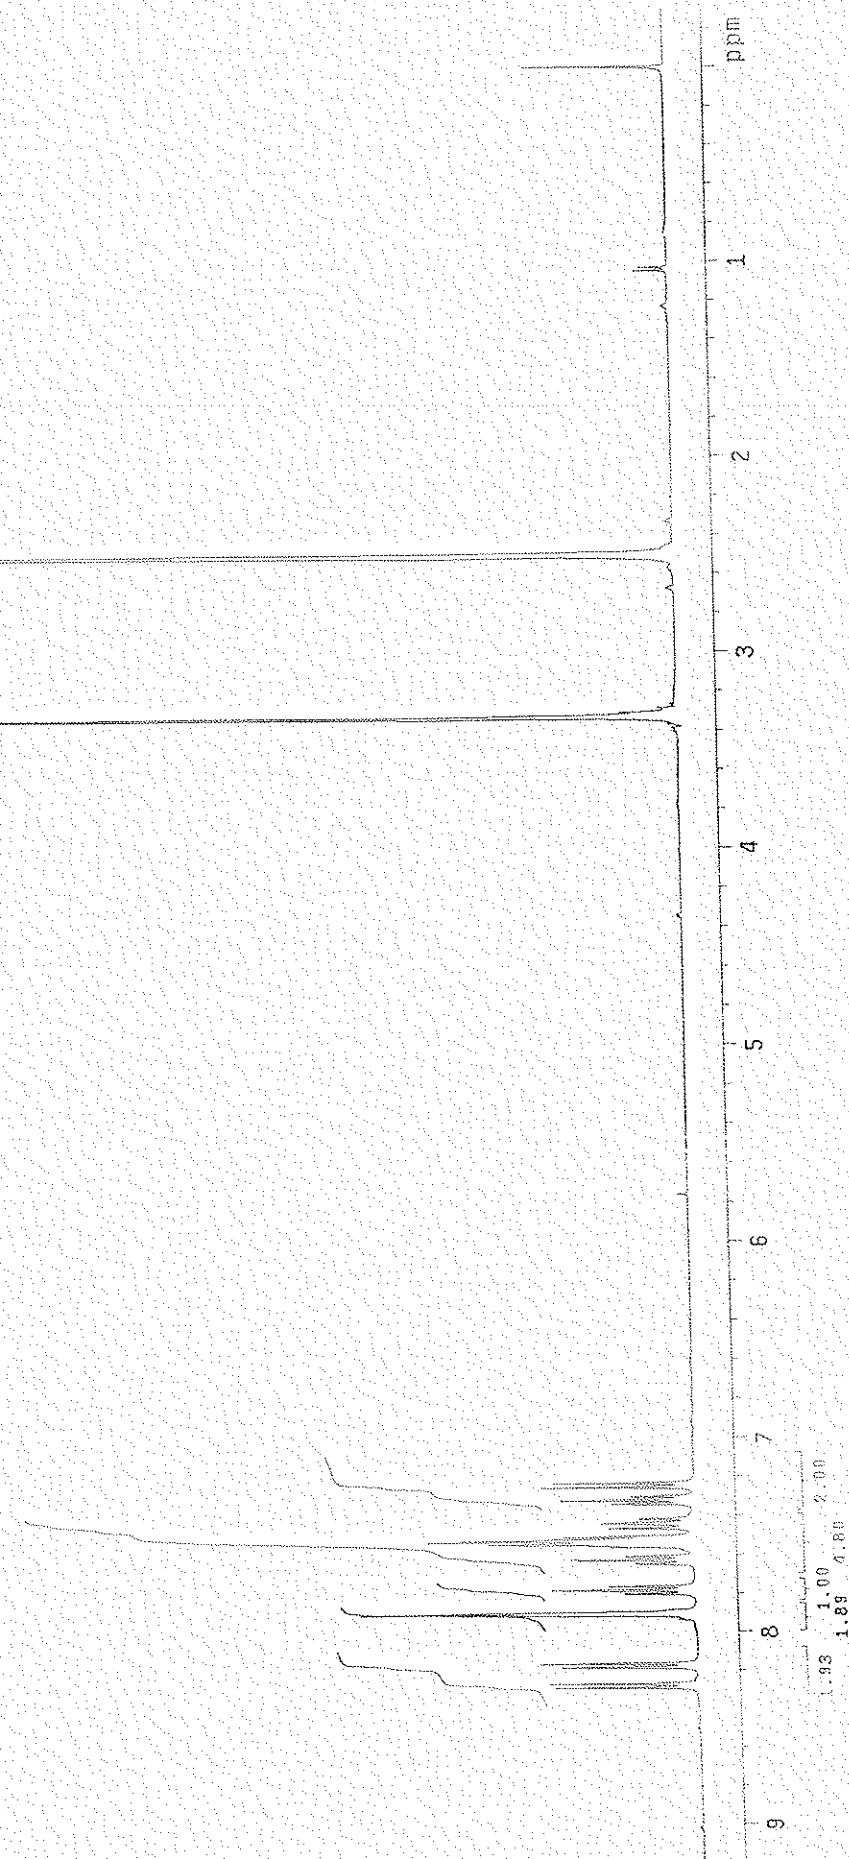

TDC-204 A728-APSK1-22 in DMSO

NMR-400  
AR.No:ME0411/1693  
Analyst:Ganesh  
Date: 18 th April, 2011

NUCLEUS : <sup>1</sup>H  
FRQ (MHz) : 400.23  
EXP : s2pul

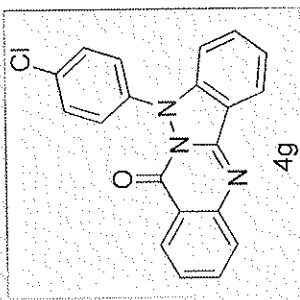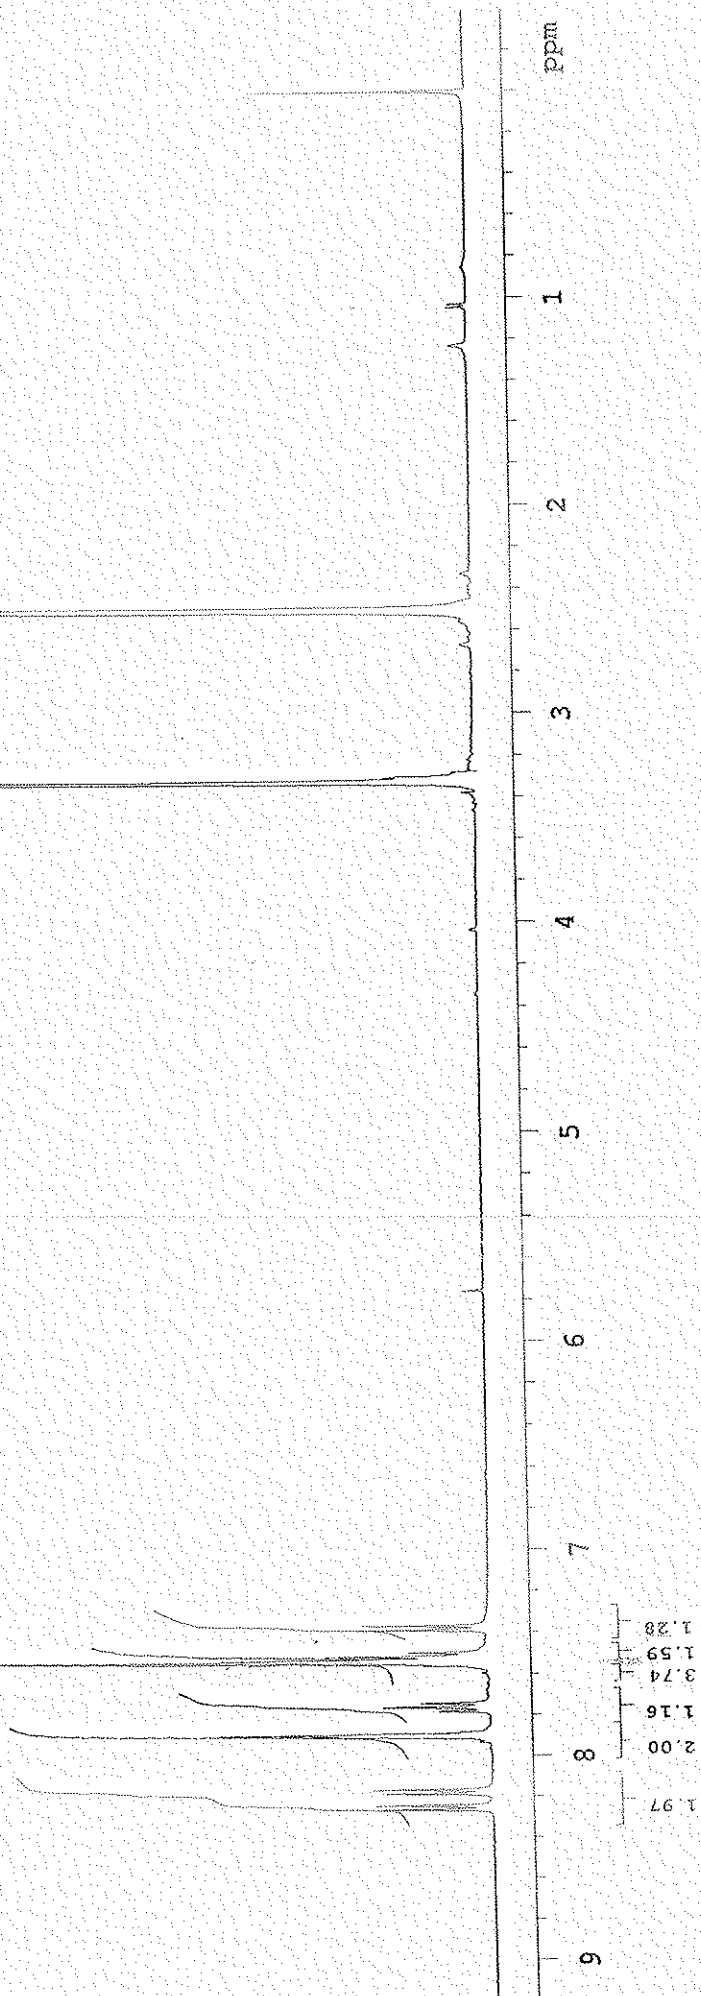

TDC-204 A728-APSK1-48 1H DMSO

NMR-600  
AR, Ro:HE1210/2250  
Analyt:HarifAbu.R  
Date: 23 th April, 2011

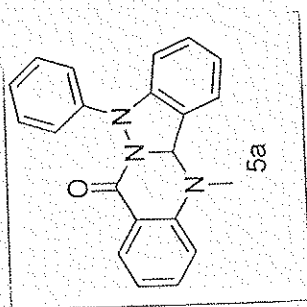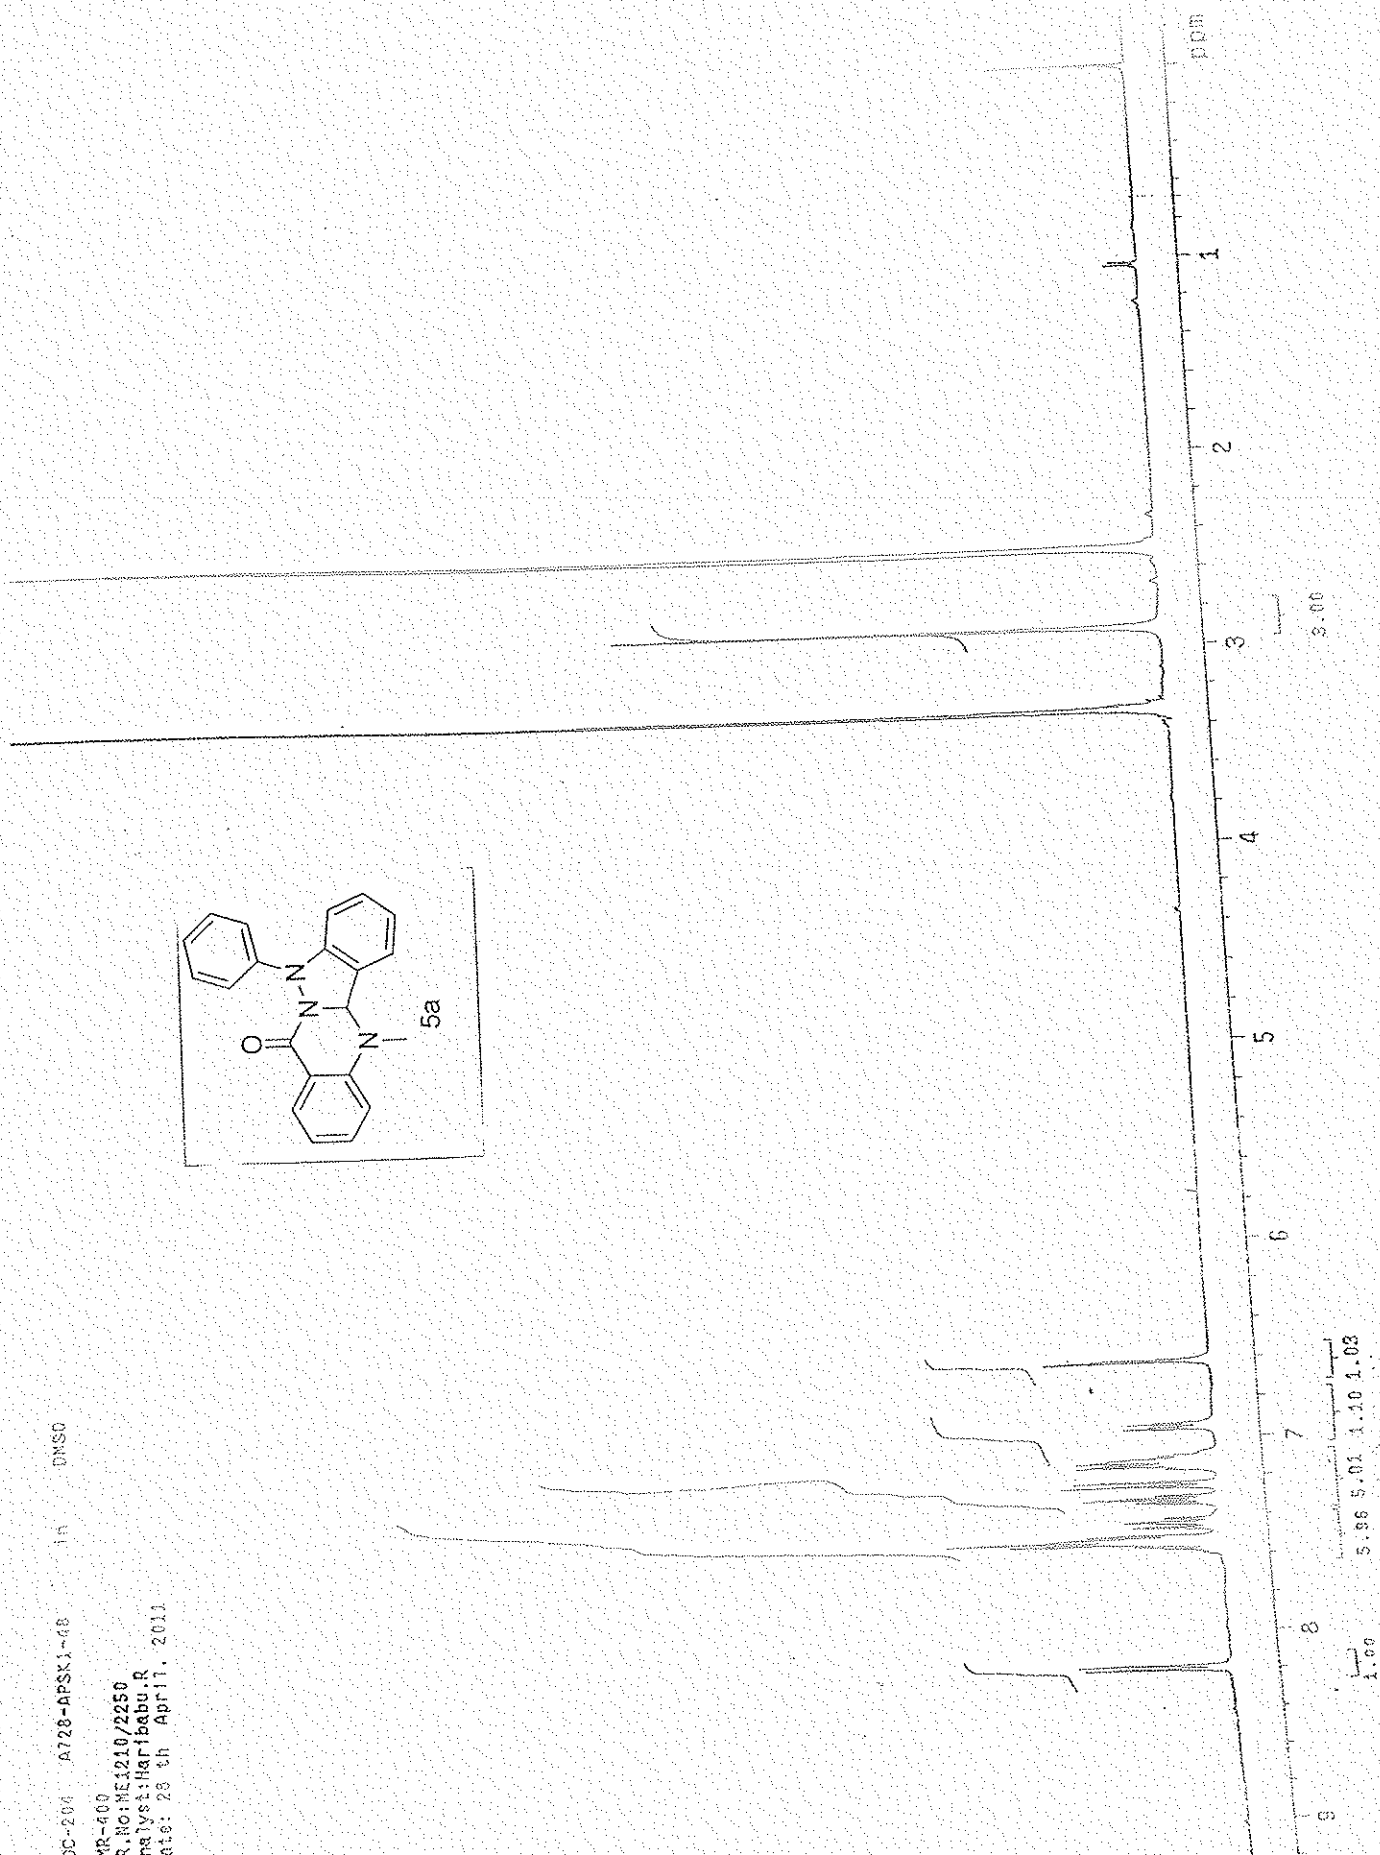



TQC-200 A728-APSK1-60 1H CDC13

NMR-600  
AK:RO:RC0611/274  
Analyst:Haribabu.R  
Date:08rd June, 2011

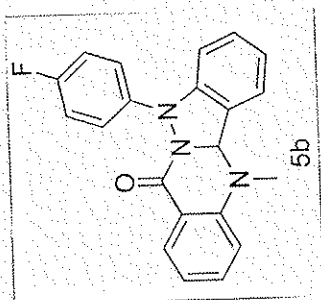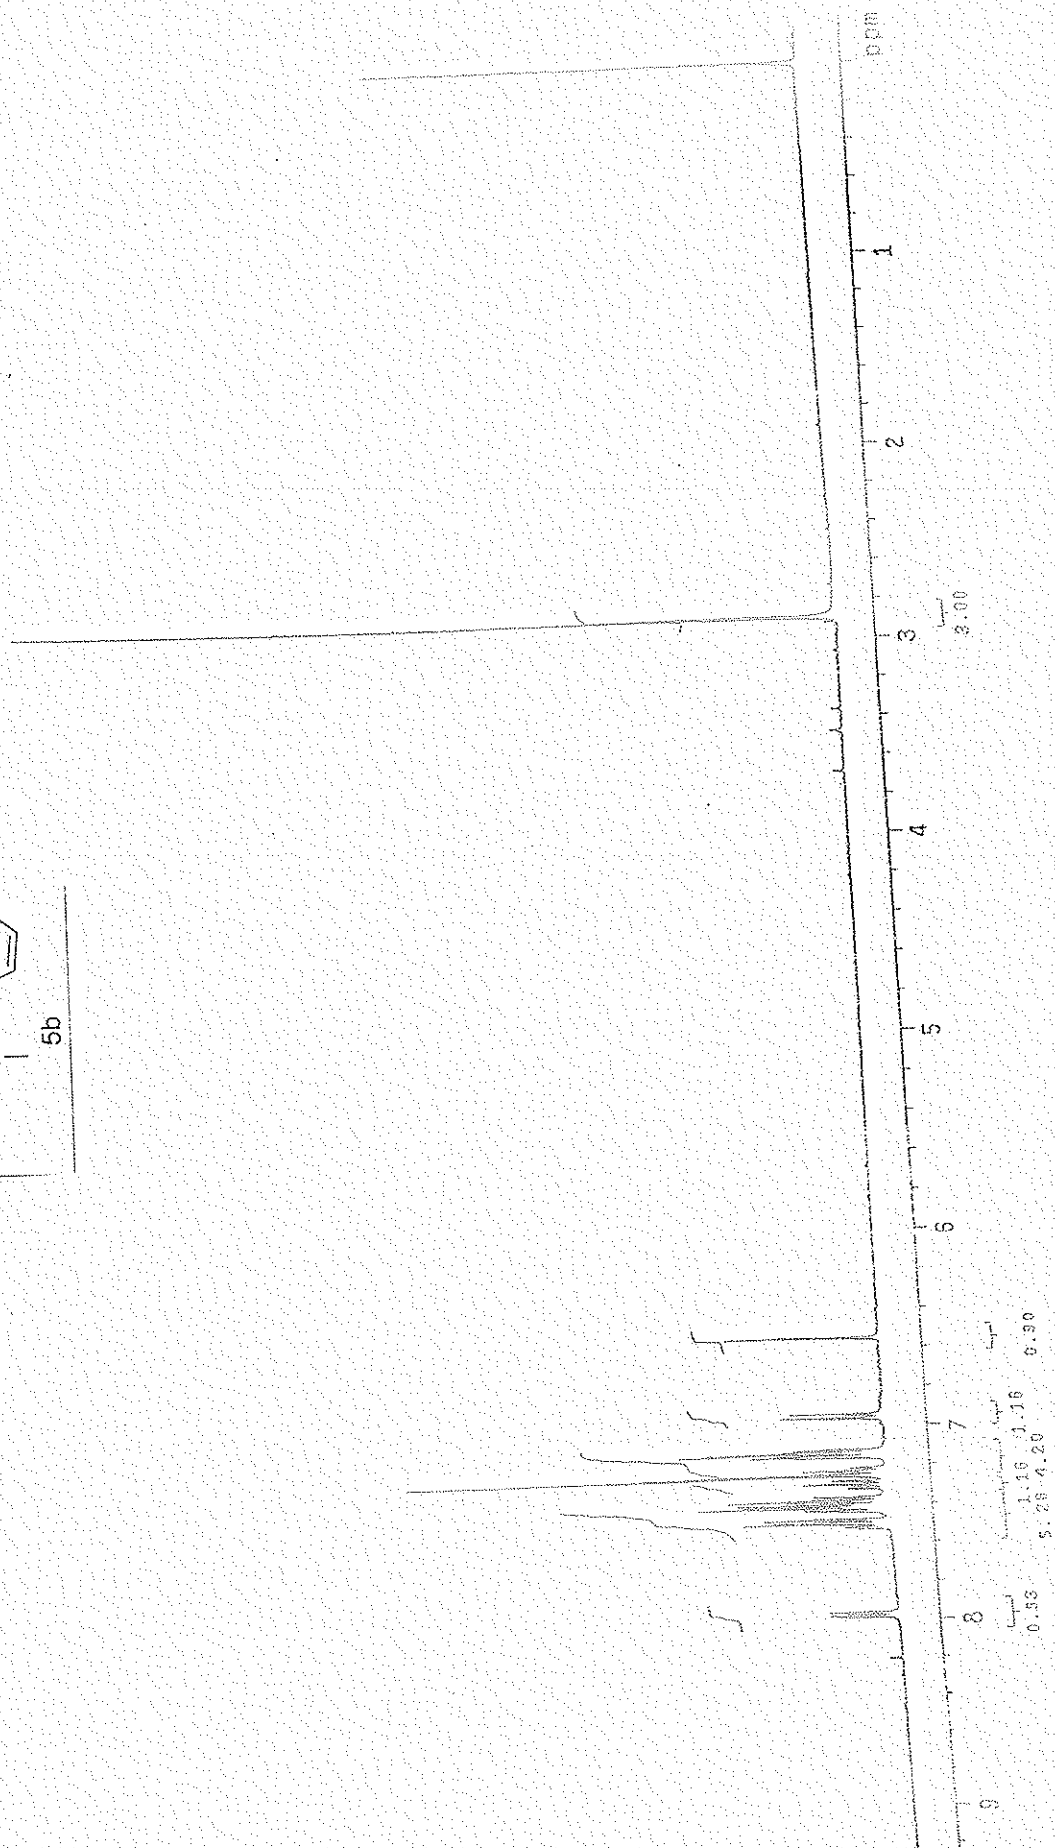

1h DMSO

TDC-204 A728-APSK1113

HRM-600  
AN.MC:ME0611/1287  
Analyt: Ganesh  
Date: 10th June, 2011

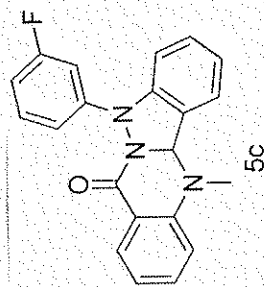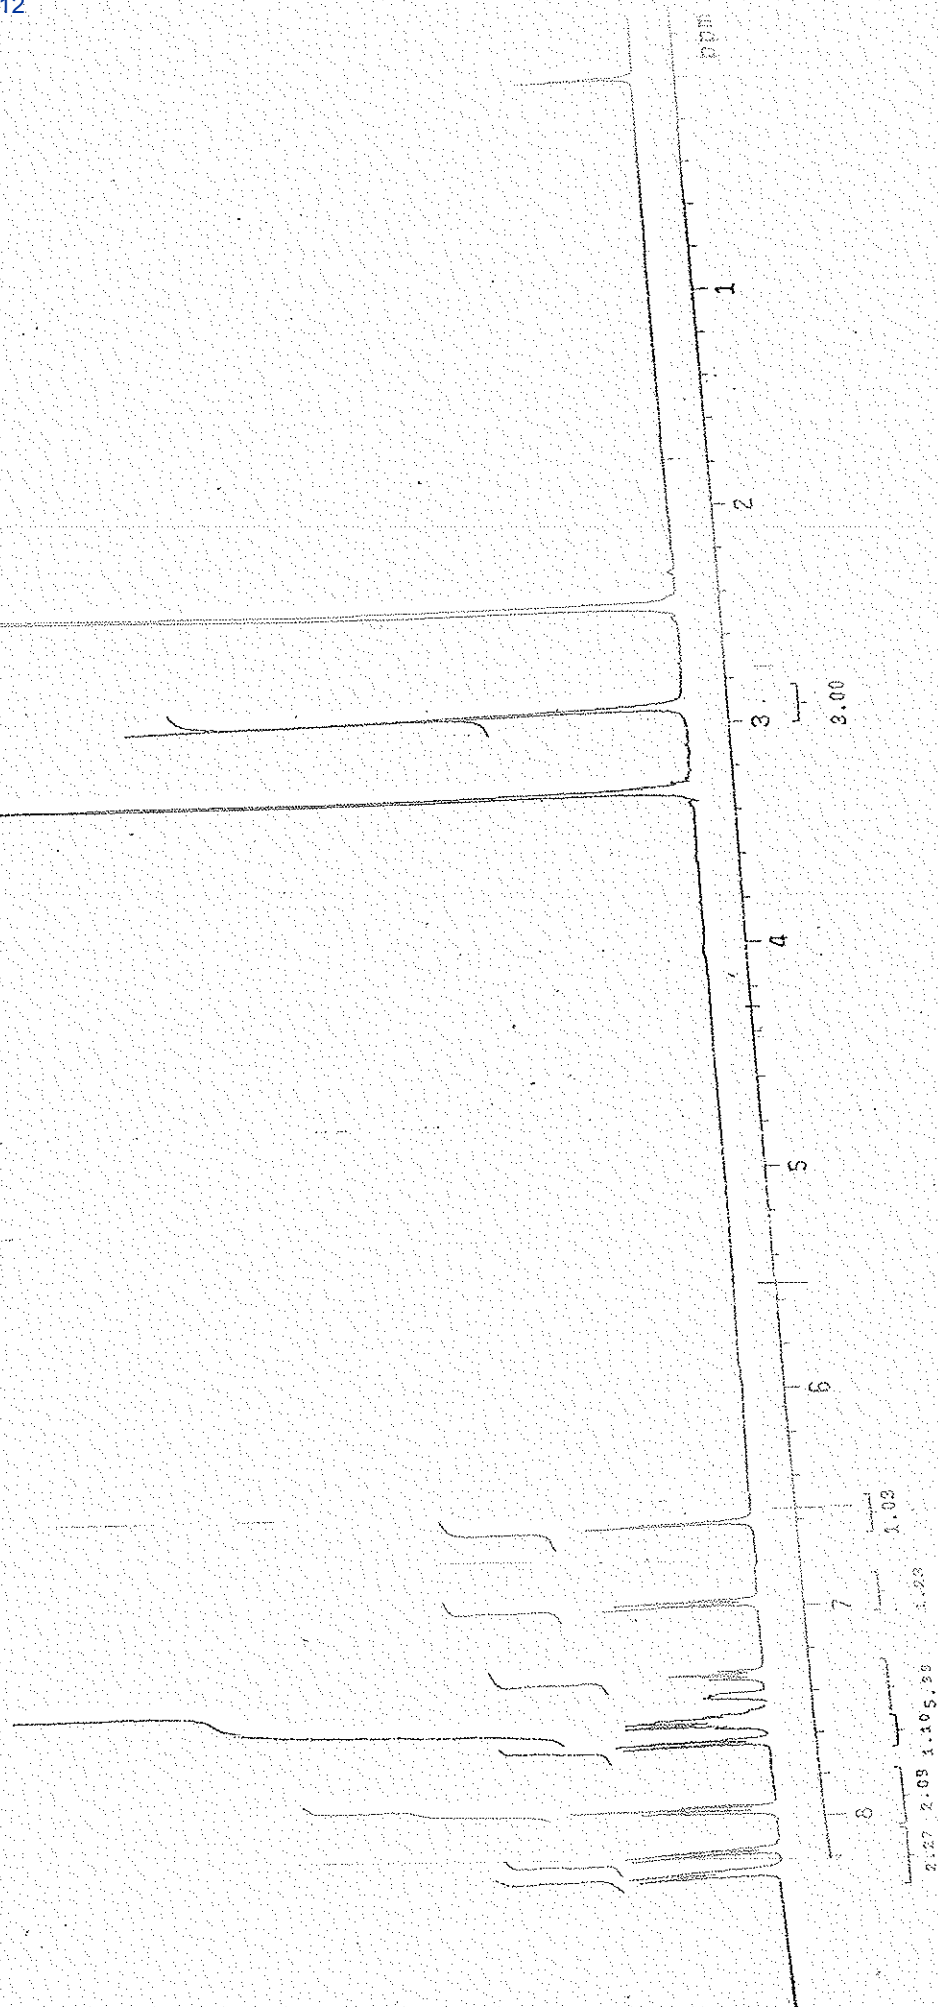

TDC-204 A729-APSK1-69 16 DMSO

NMR-100  
Acq. No: WE0811/1397  
Analyst: Ganes  
Date: 11th June, 2011

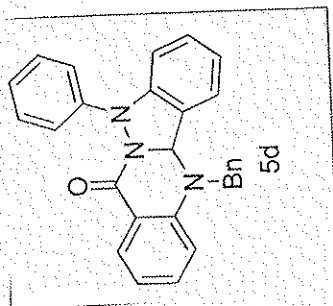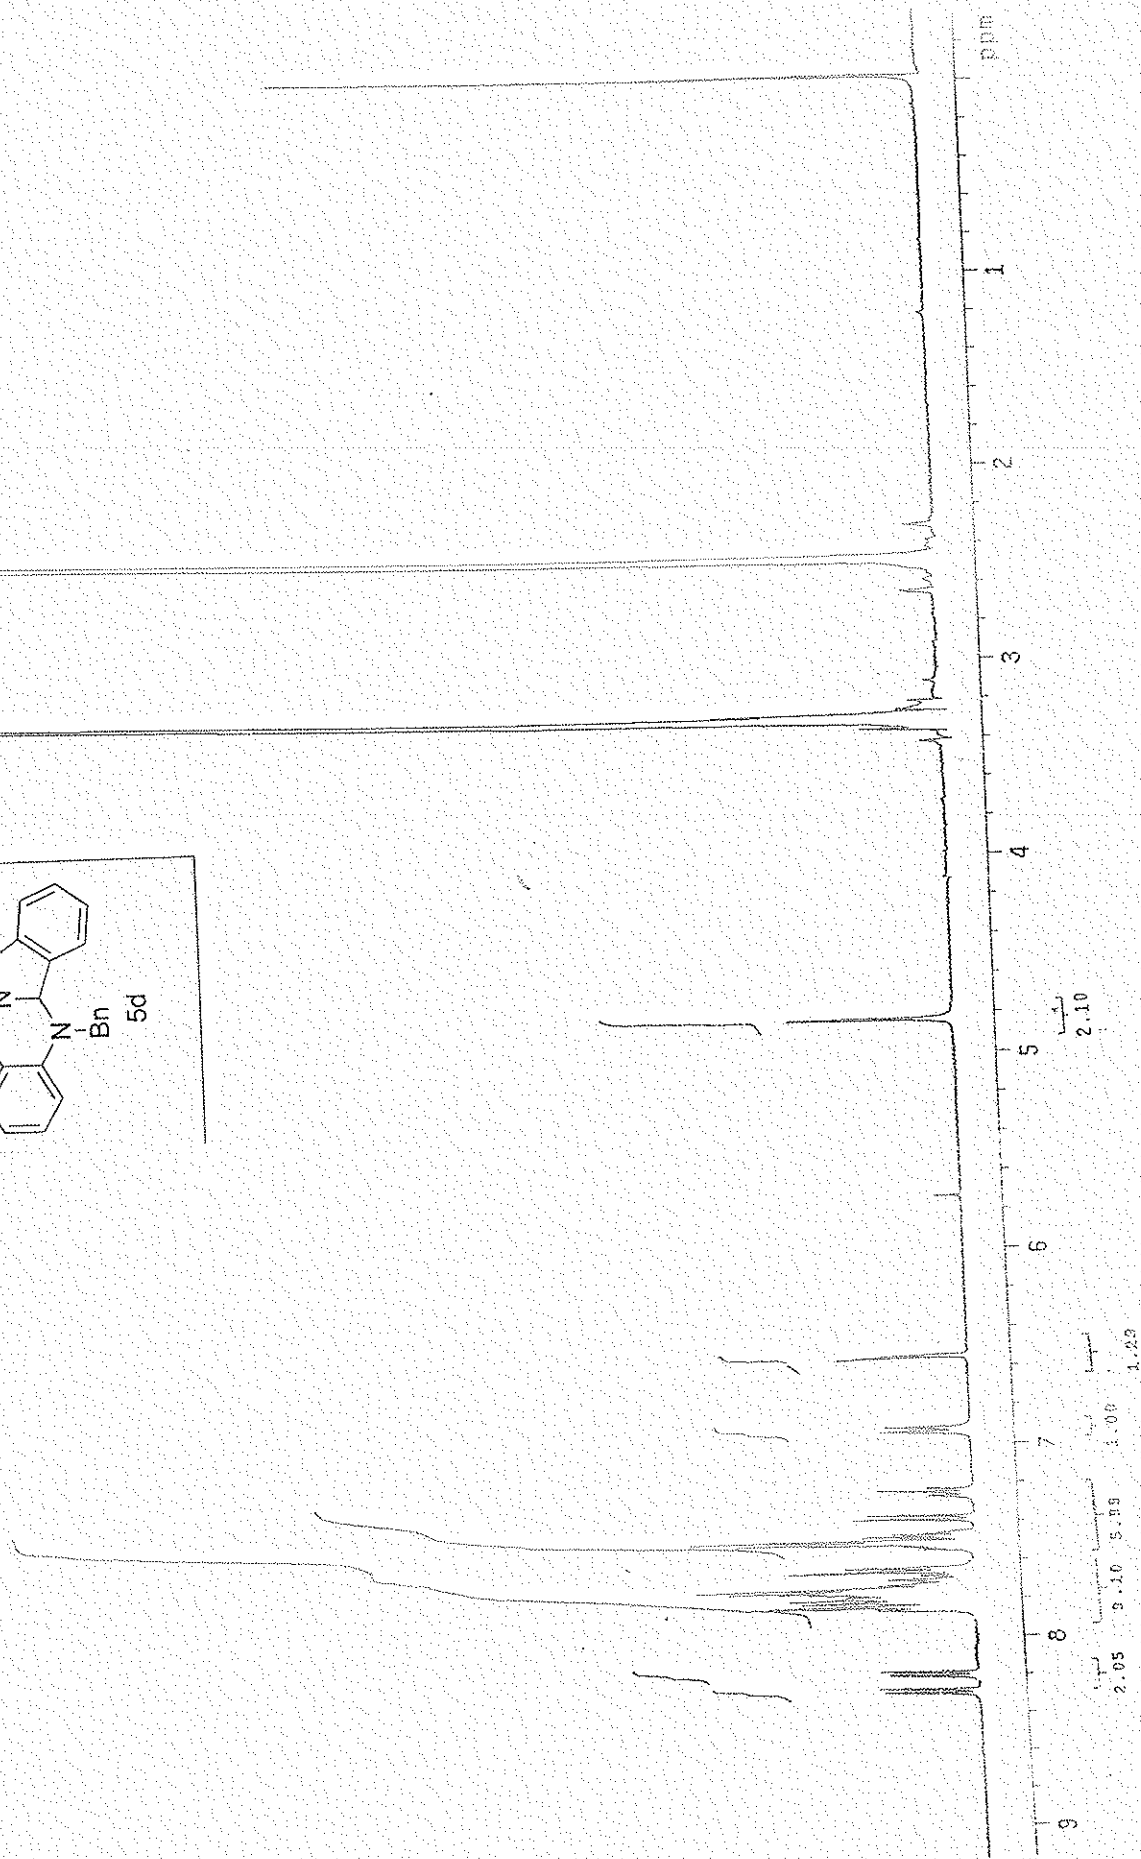

TDC-204 A720-APSK1-77 in DMSO  
D2OExchange  
RMK-400  
AR. NO: ME0611/1597  
Analyst: Ganesh  
Date: 16th June, 2011

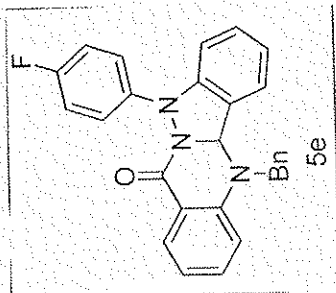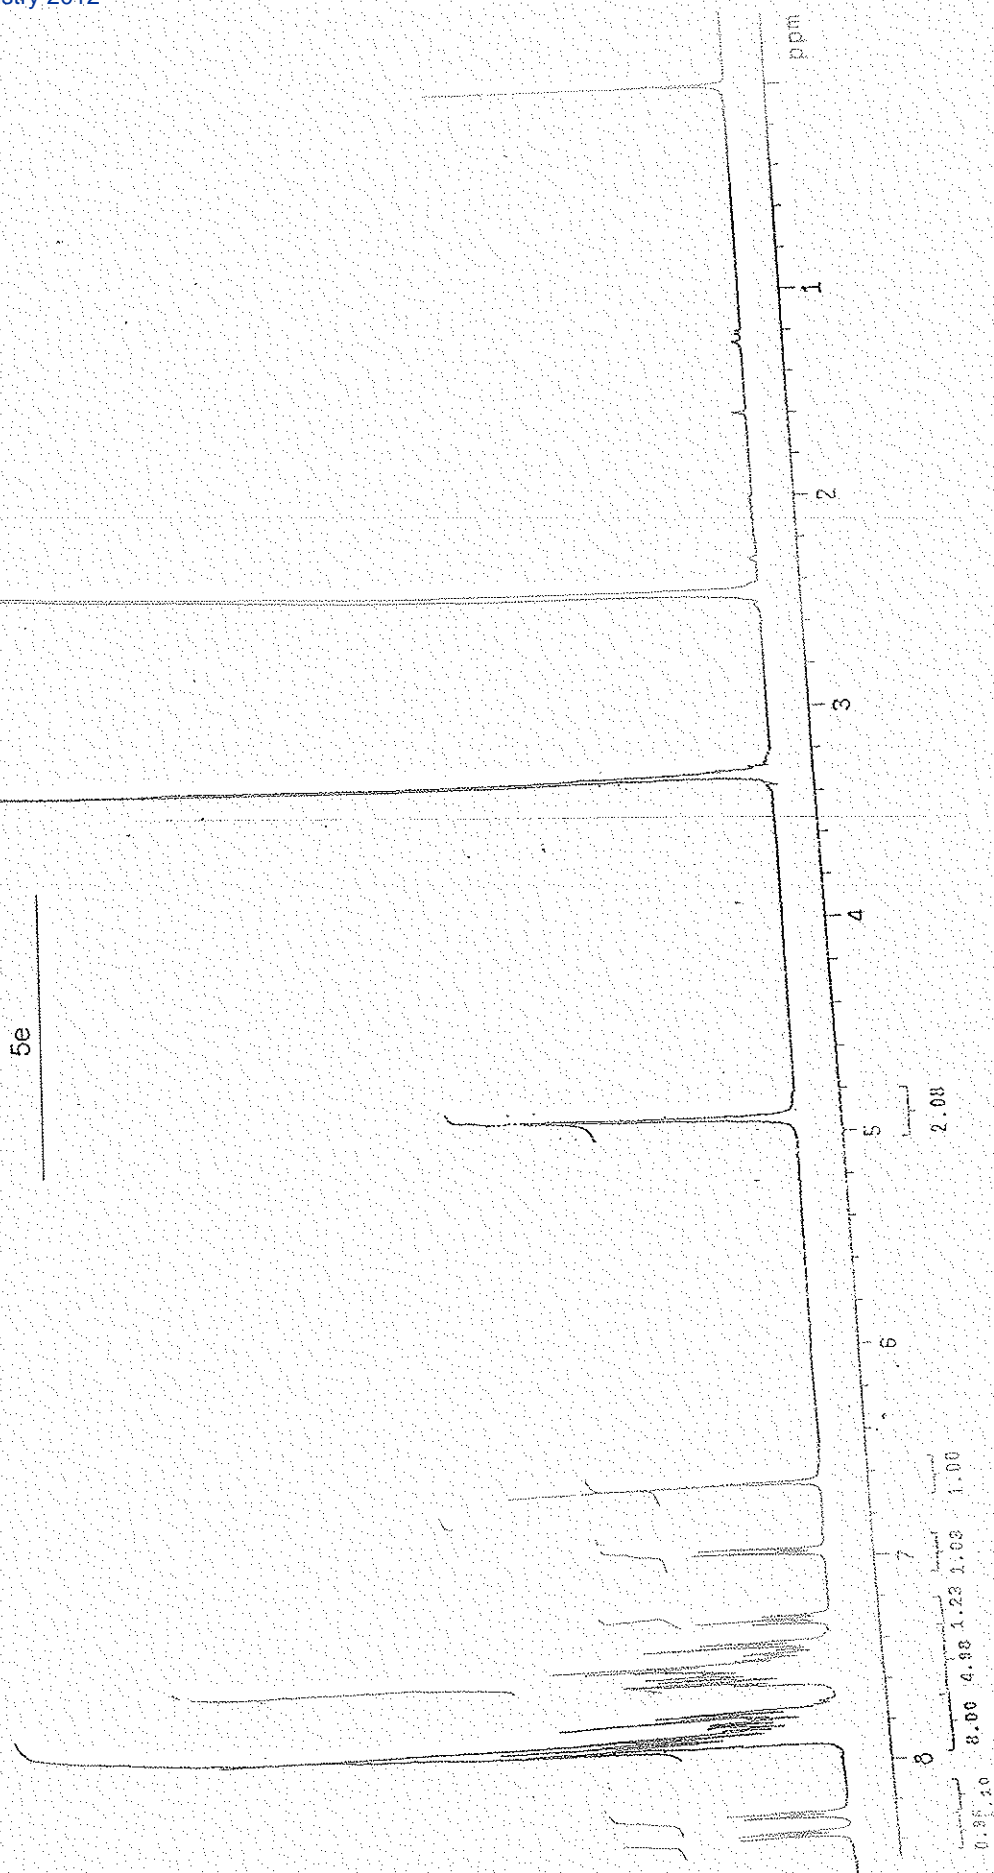

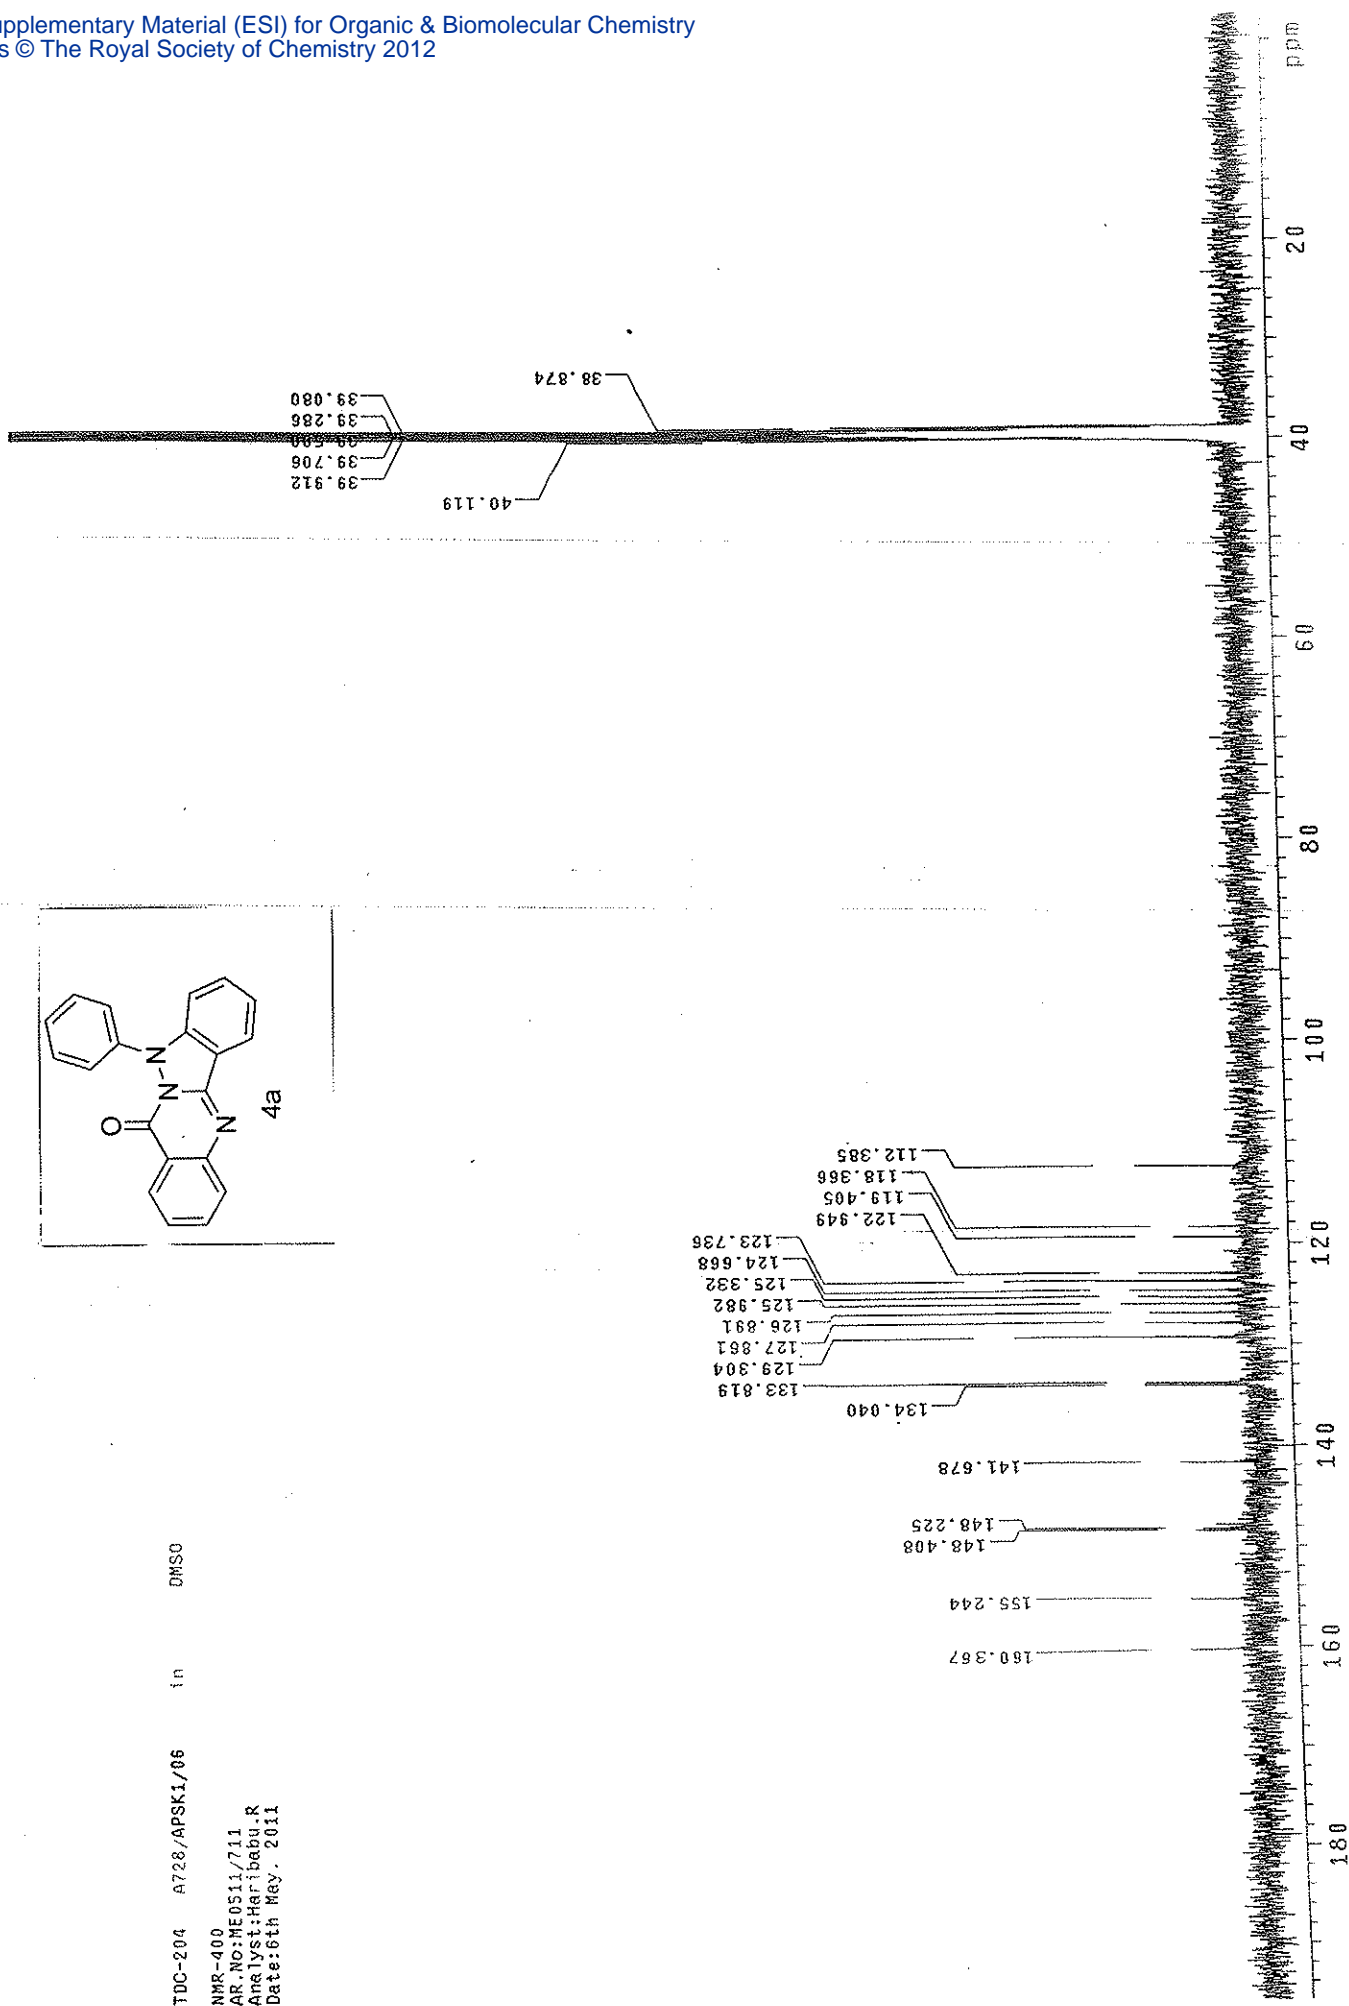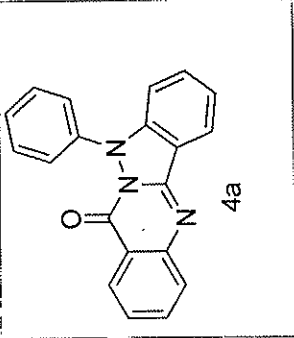

DMSO

in

TDC-204 A728/APSki/06

NMR-400  
AR No: ME0511/711  
Analyst: Haribabu.R  
Date: 16th May, 2011



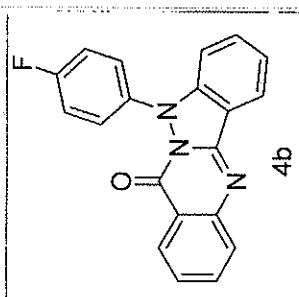

DMSO

in

TDC-204 A728/APSK1/11

NMR-400

AK.No:ME0511/712

Analyst:Haribabu.R

Date:6th May. 2011

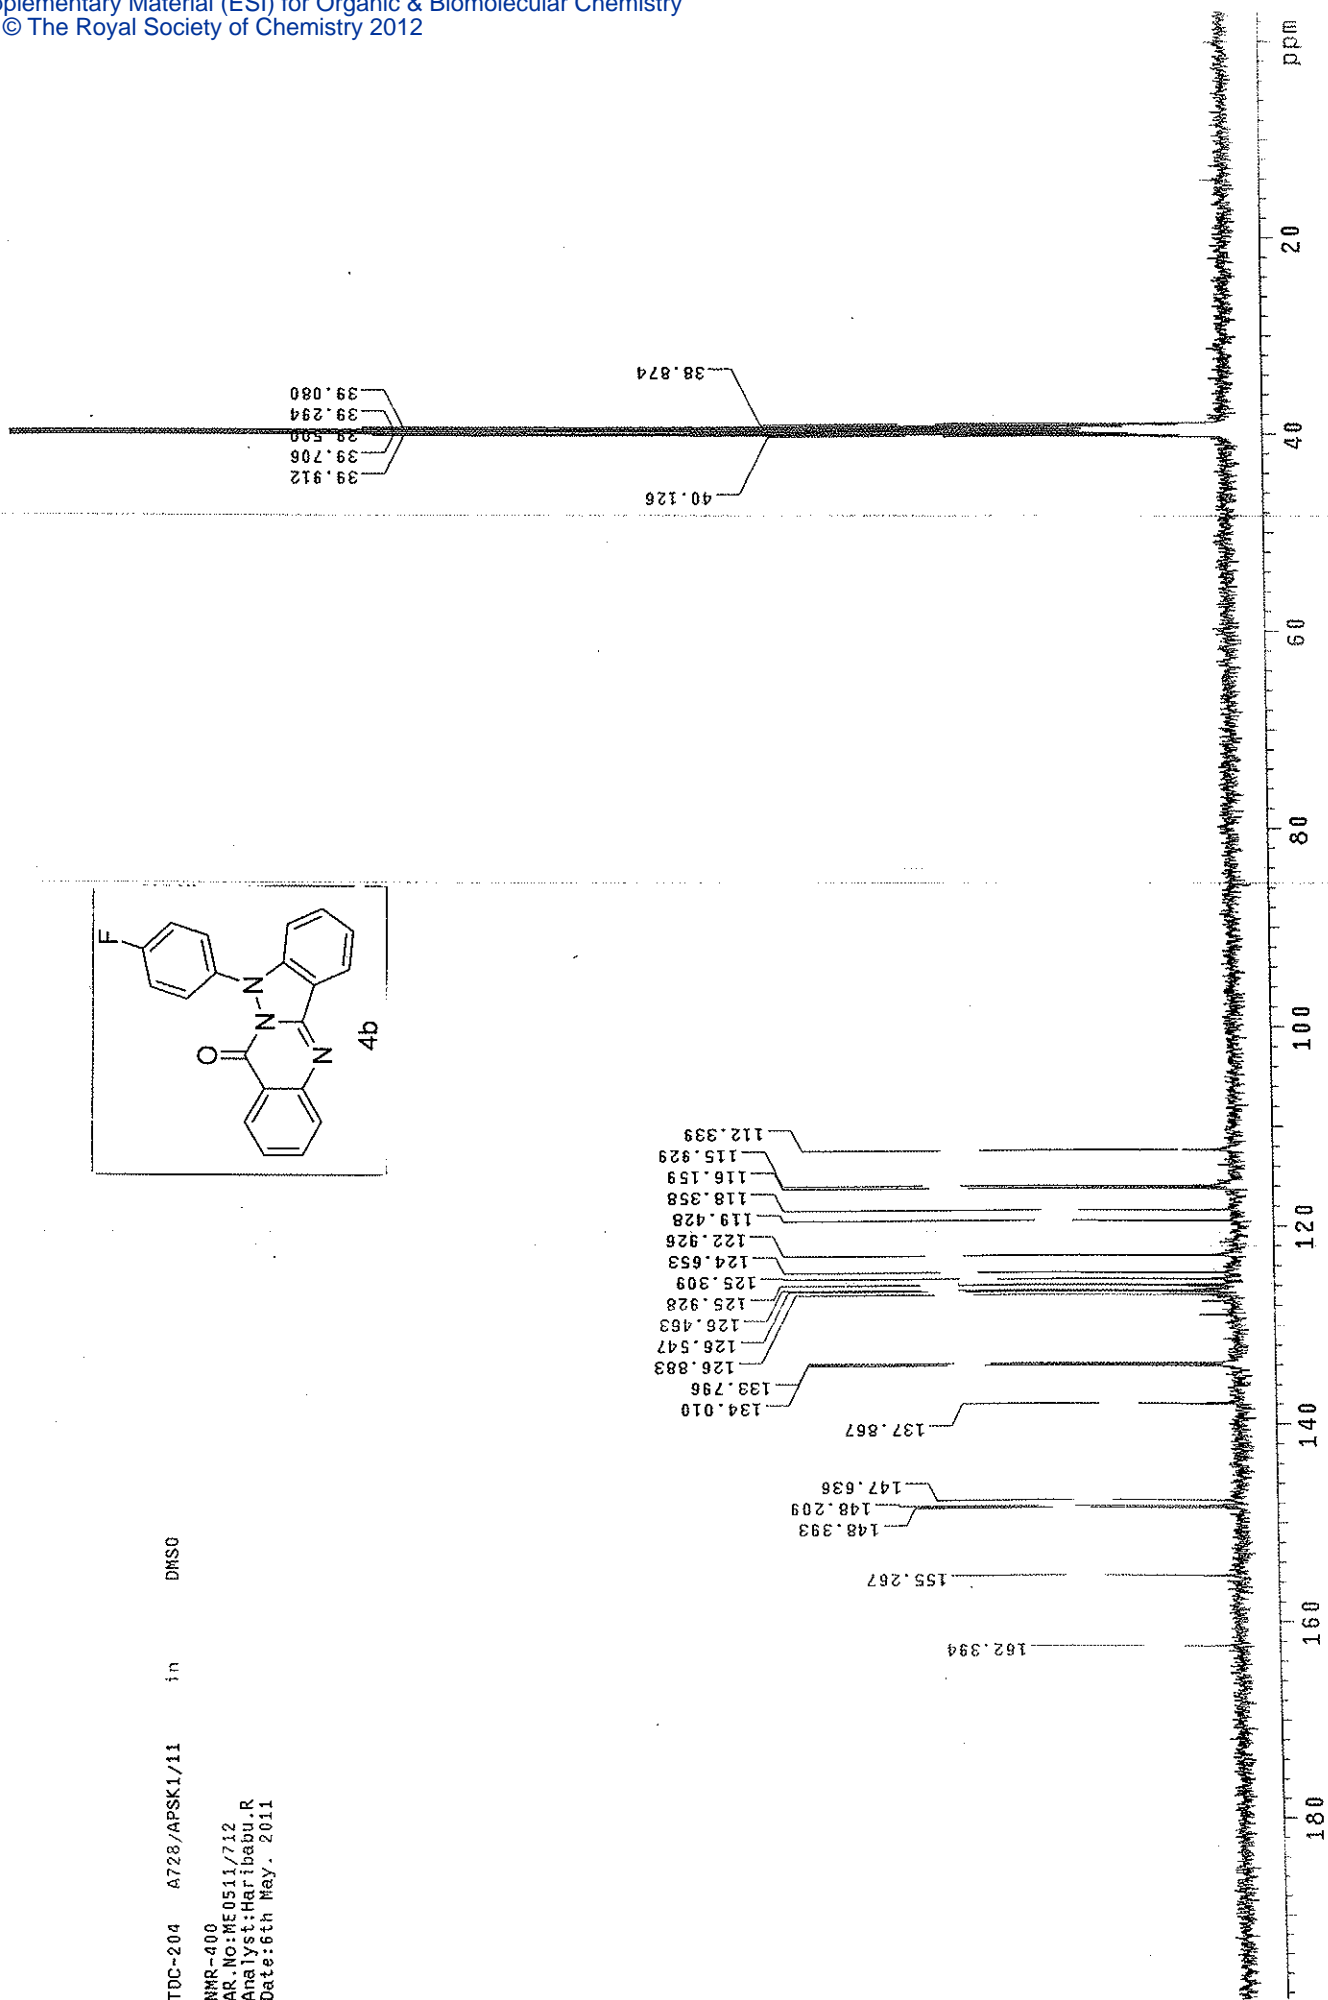

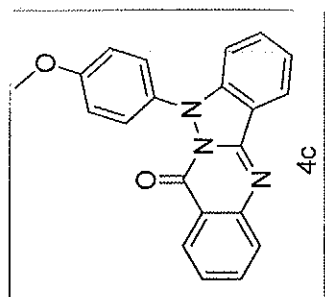

TDC-204 A728/APSK1/13 ip DMSO

NMR-400  
Acq. No: RE0511/713  
Analyst: Haribabu.R  
Date: 6th May, 2011

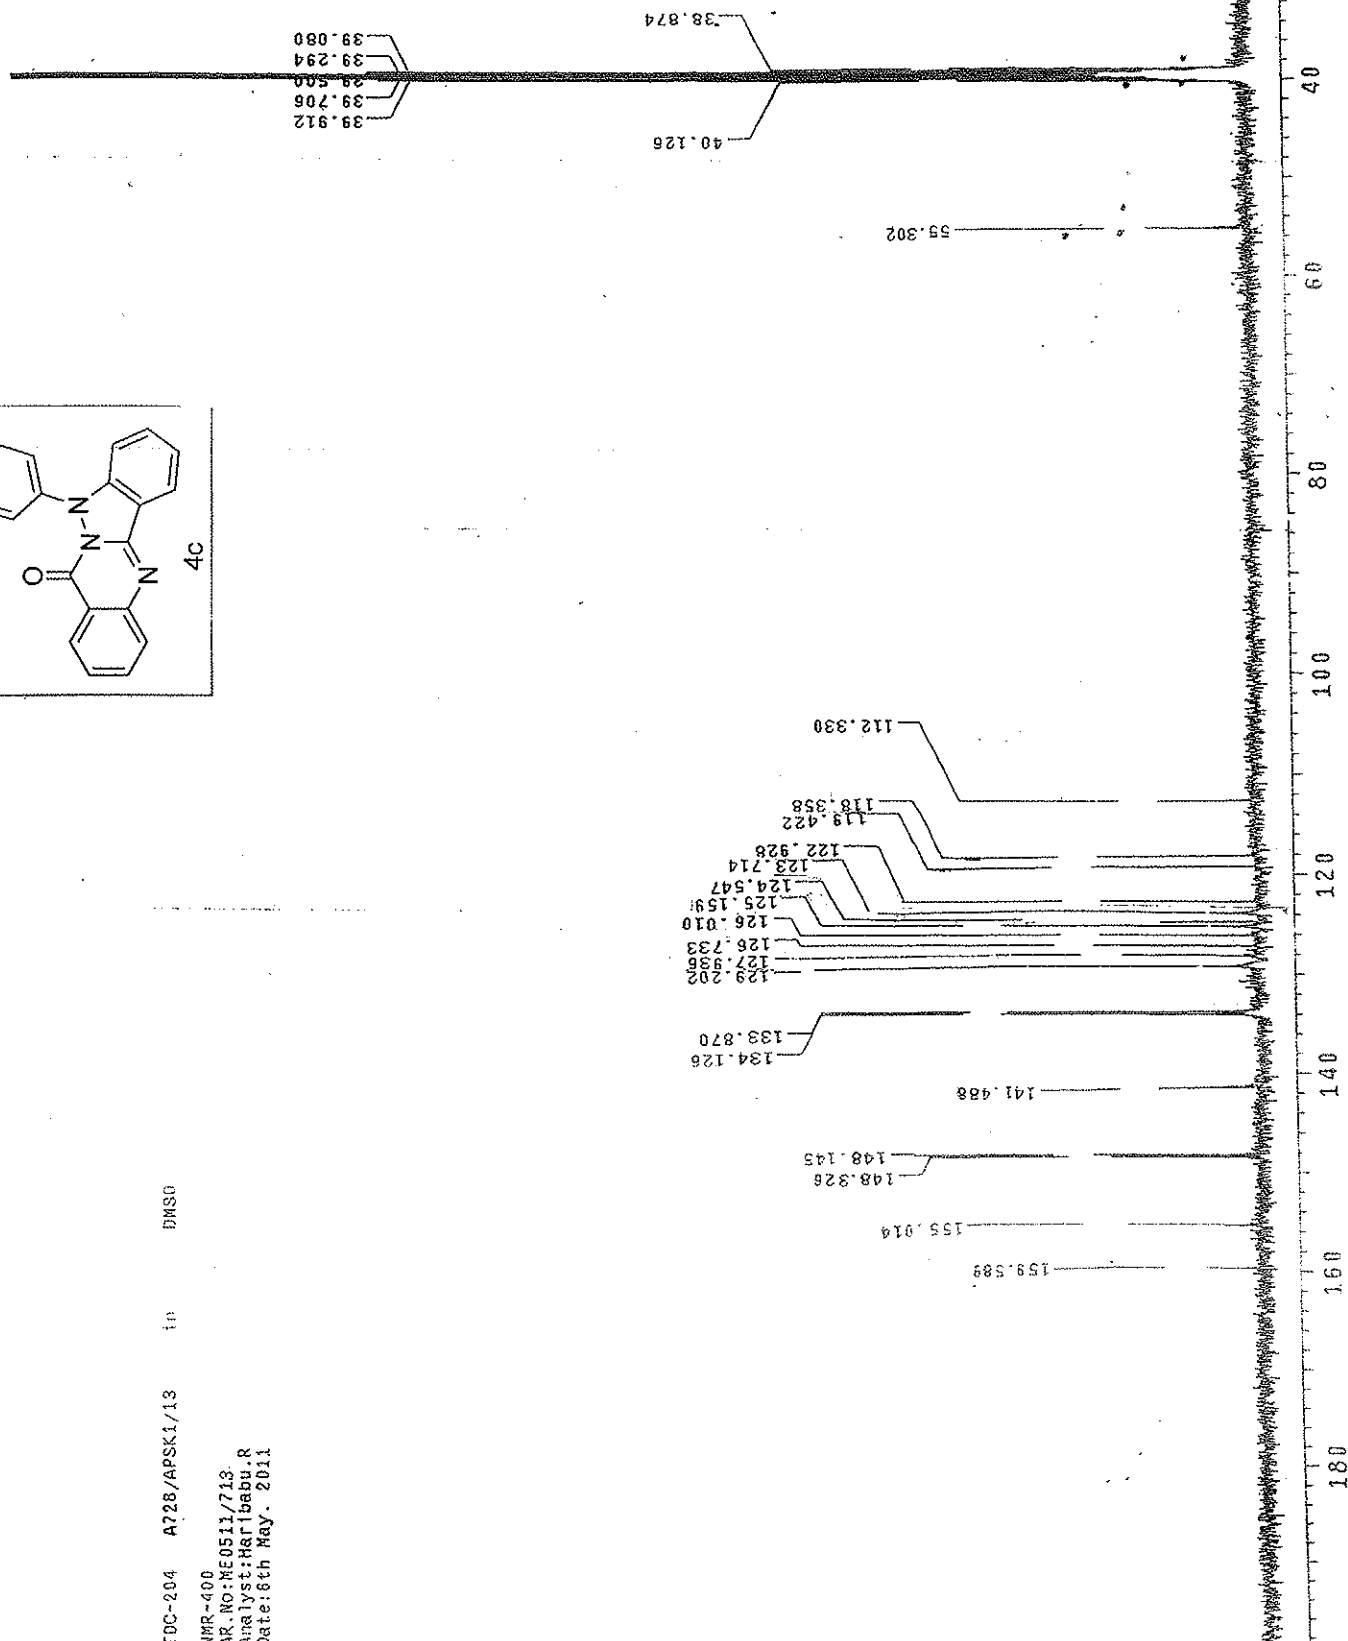

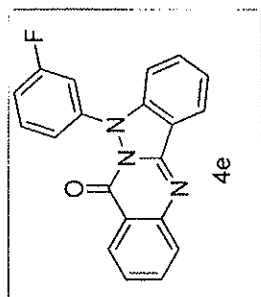

DMSO

in

TDC-206 A728-APSK1-19

NMR-400

AR.No:MF0411/1561

Analyst:Meribabu.R

Date: 16 th April, 2011

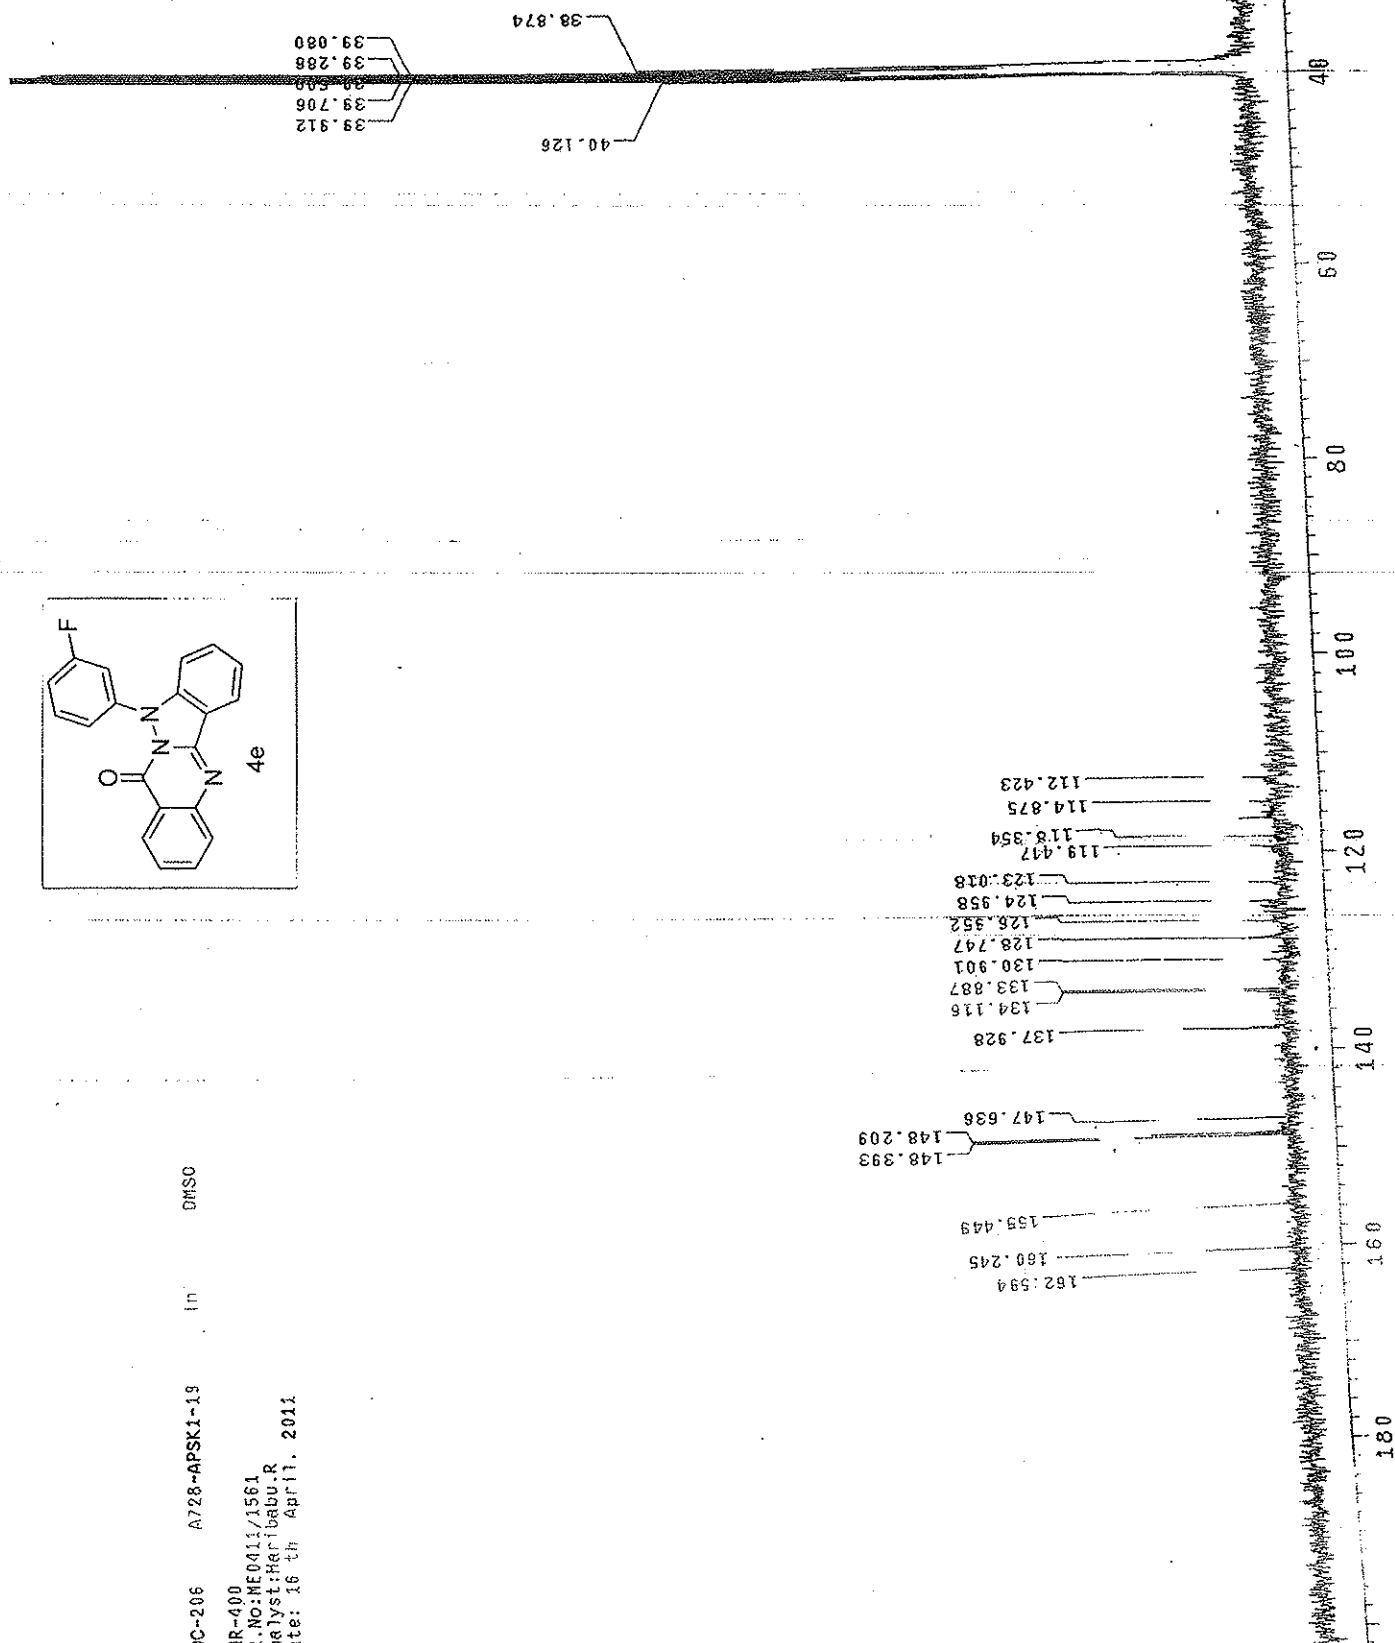

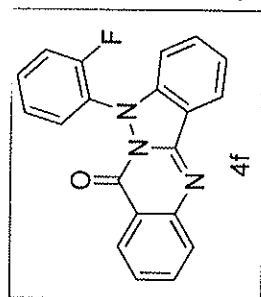

DMSO

in

TDC-204 A728-APSK1-28

NMR-409

AR\_NO:ME9411/3022

Analyst: Ganesh

Date: 29<sup>th</sup> April, 2011

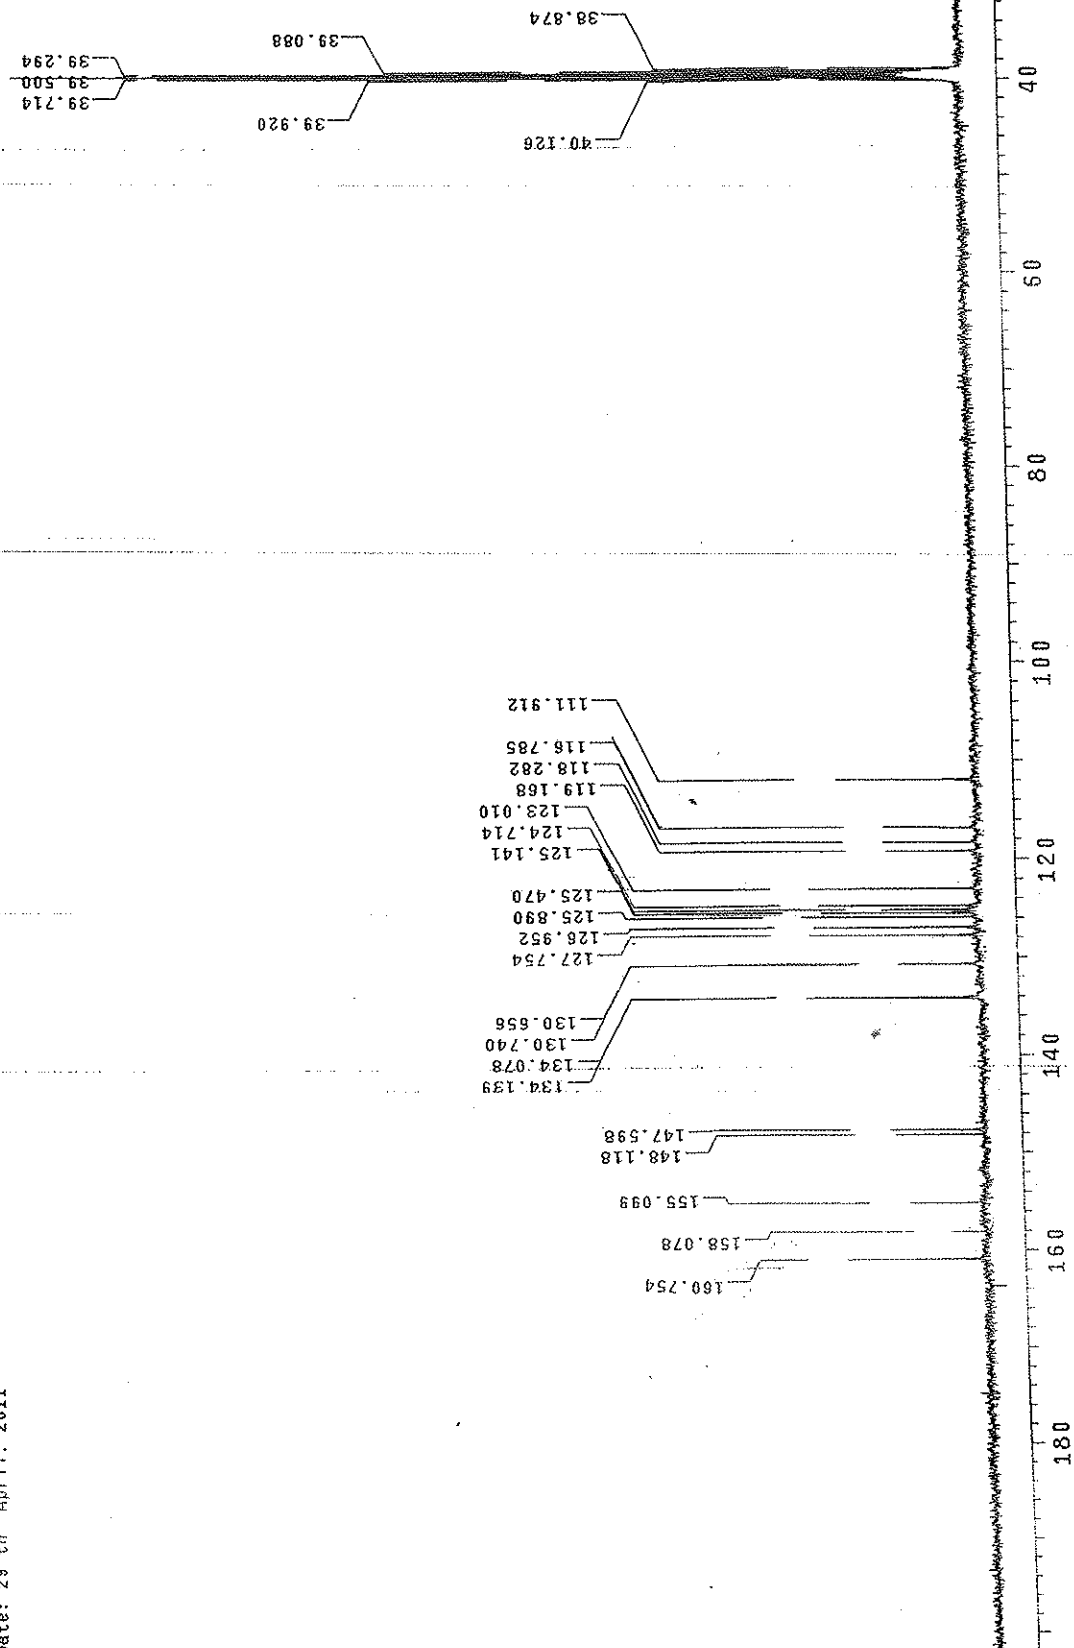

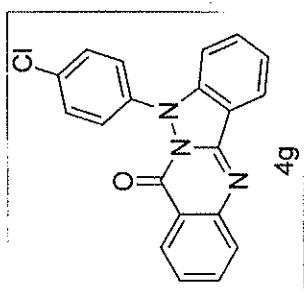

TDC-204 A728/APSX1/22  
NMR-400  
AR-NO:ME0411/2237  
Analyt:Heribabu.R  
Date: 21 st April, 2011

in DMSO

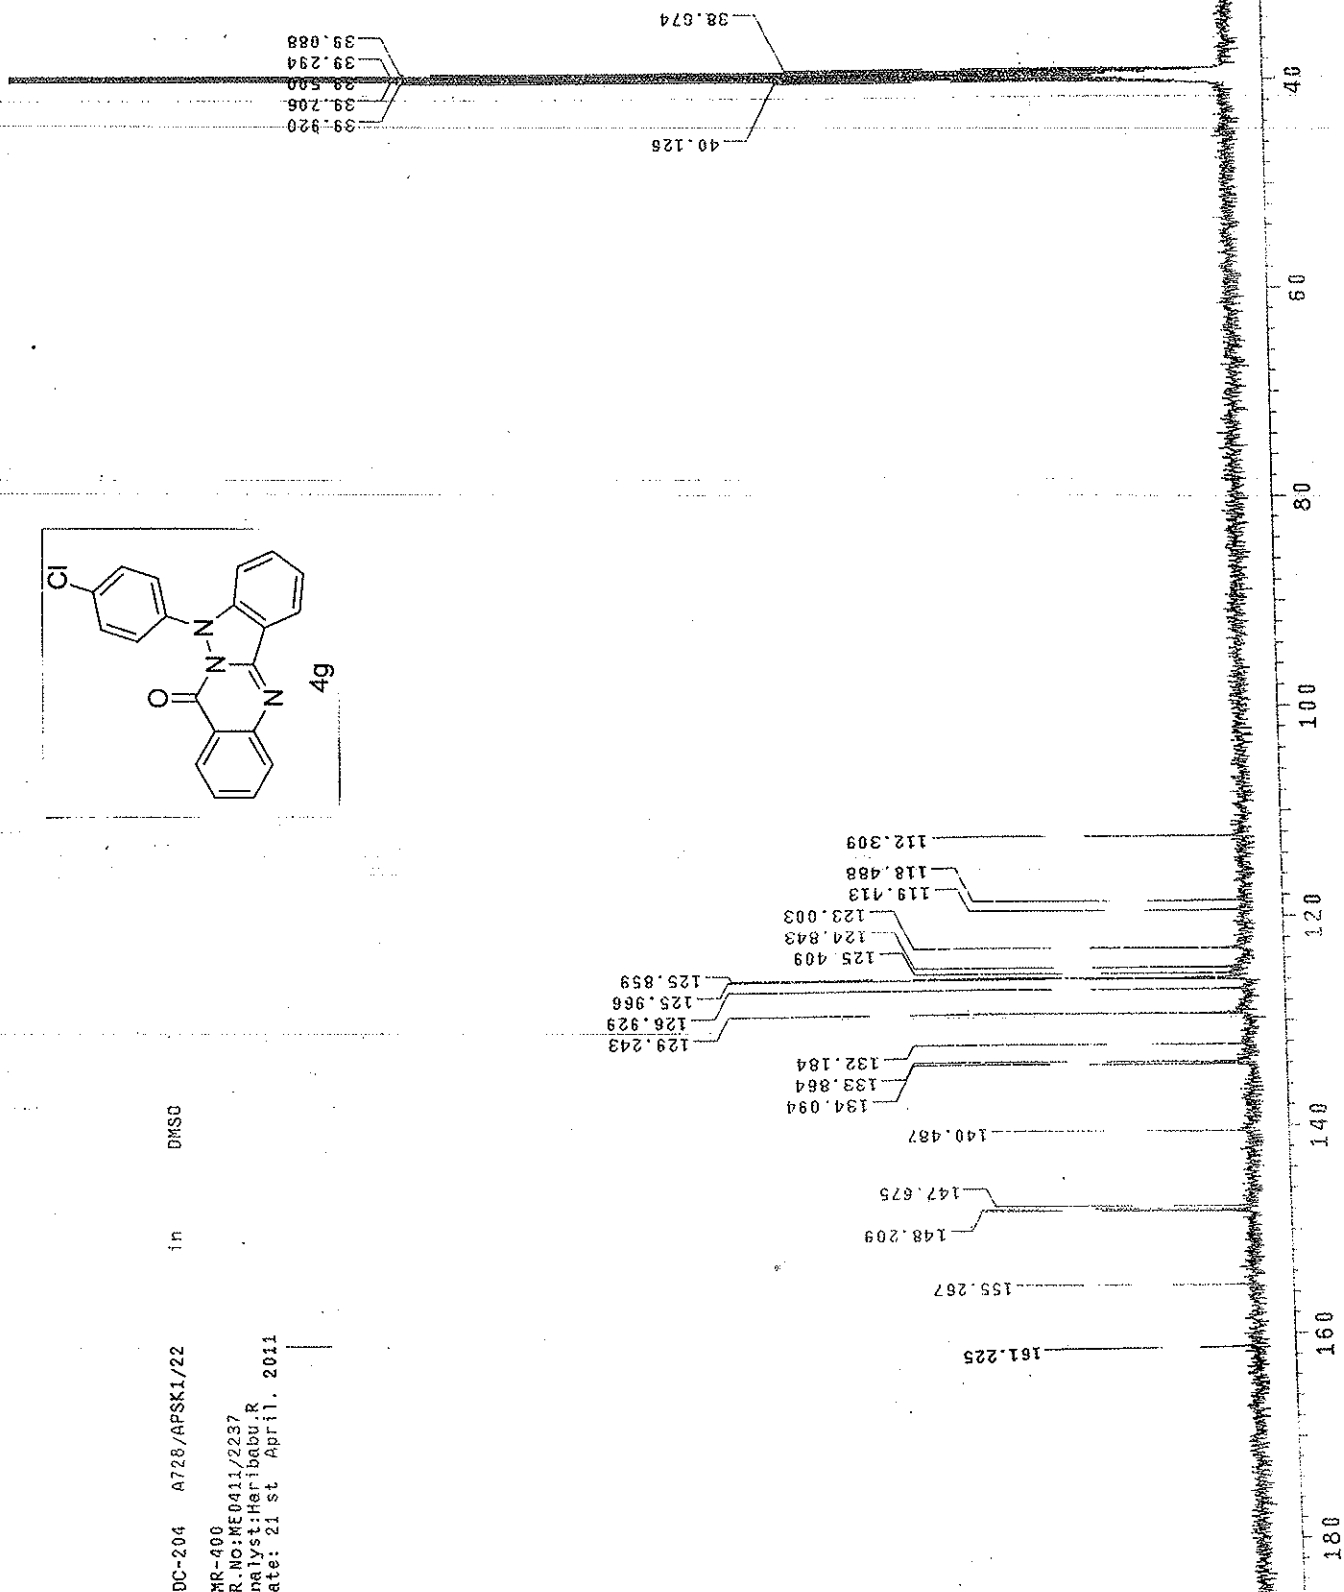



TDC-204 A728-APSK1-48 in CDCl<sub>3</sub>

NMR-400  
Acq. No: ME0511/716  
Analyt: Heribabu.R  
Date: 6th May, 2011

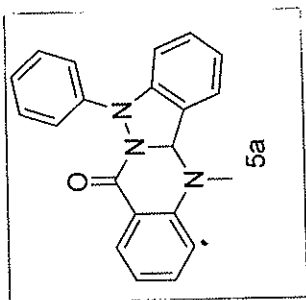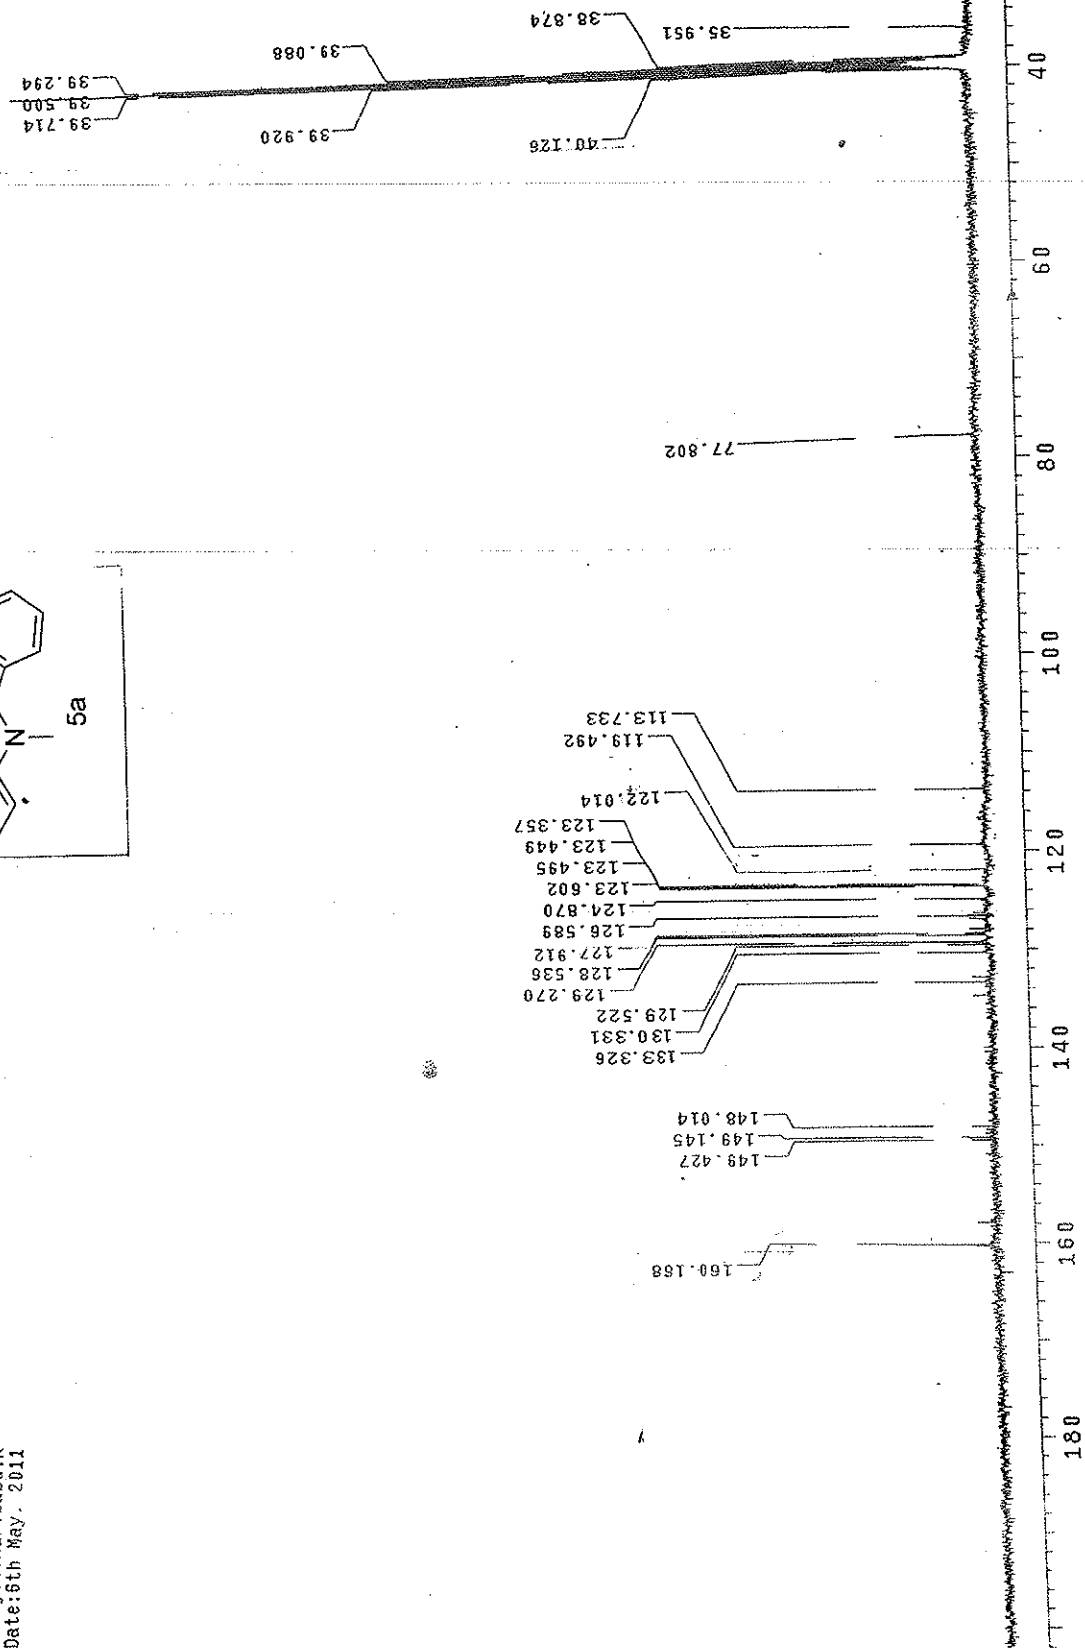

Supplement: c2ob25296a.pdf [file c2ob25296a.pdf]
